# 1 Using singleton densities to detect recent 2 selection in *Bos taurus*

3 *Matthew Hartfield*<sup>1,2</sup>, *Nina Aagaard Poulsen*<sup>3</sup>, *Bernt Guldbrendtsen*<sup>4,5</sup>, *Thomas*  
4 *Bataillon*<sup>1</sup>

5 1) Bioinformatics Research Centre, Aarhus University, DK-8000 Aarhus, Denmark.

6 2) Institute of Evolutionary Biology, University of Edinburgh, Edinburgh EH9 3FL, UK.

7 3) Department of Food Science, Aarhus University, Agro Food Park 48, 8200 Aarhus  
8 N, Denmark.

9 4) Center for Quantitative Genetics and Genomics, Department of Molecular Biology  
10 and Genetics, Aarhus University, DK-8830 Tjele, Denmark.

11 5) Rheinische Friedrich-Wilhelms-Universität Bonn, Institut für Tierwissenschaften,  
12 Tierzucht, Endenicher Allee 15, D-53115 Bonn, Germany.

13

14 *Corresponding author:* Matthew Hartfield ([m.hartfield@ed.ac.uk](mailto:m.hartfield@ed.ac.uk)).

15

16 **Key words:** selection, genomics, *Bos taurus*, milk protein, stature.

17 **Abstract: Many quantitative traits are subject to selection, where several**  
18 **genomic regions undergo small, simultaneous changes in allele frequency that**  
19 **collectively alter a phenotype. The widespread availability of genome data, along**  
20 **with novel statistical techniques, has made it easier to detect these changes. We**  
21 **apply one such method, the ‘Singleton Density Score’, to the Holstein breed of**  
22 ***Bos taurus* to detect recent selection (arising up to around 740 years ago). We**  
23 **identify several candidate genes for recent selection, including some relating to**  
24 **protein and cell regulation, the synaptic system, body growth, and immunity. We**  
25 **do not find strong evidence that two traits important for humans, milk–protein**  
26 **content and stature, have been subject to directional selection. These results**  
27 **inform on which genes underlie recent domestication in *B. taurus*. We propose**  
28 **how polygenic selection can be best investigated in future studies.**

## 29 ***Introduction***

30           Determining which genomic regions have been subject to selection is a major  
31 research goal in evolutionary genetics. Traditional methods have focused on  
32 detecting strong selection affecting individual genes (Nielsen, 2005; Vitti et al., 2013;  
33 Stephan, 2019). An alternative process is ‘polygenic selection’, where many loci  
34 contribute to genetic variation in a trait, so selection acting on it is expected to  
35 generate small and simultaneous allele frequency changes at multiple loci (Pritchard  
36 and Di Rienzo, 2010; Pritchard et al., 2010). Many polygenic models have been  
37 formulated that account for both the response to phenotypic selection, and the  
38 maintenance of genetic variance at quantitative traits (reviewed by Sella and Barton  
39 [2019]). Among them is Fisher’s infinitesimal model, which is important for its  
40 historical role in uniting population and quantitative genetics, and its recent  
41 renaissance in the context of genome-wide association studies (Fisher, 1918; Barton  
42 and Keightley, 2002; Barton et al., 2017; Charlesworth and Edwards, 2018; Visscher  
43 and Goddard, 2019). However, whereas it has been possible to identify which genetic  
44 regions contribute to trait variation, it has historically been hard to infer which alleles  
45 have been involved in the polygenic selection response. Extensive theoretical studies  
46 of how alleles at multiple loci act when a population adapts to a new optimum  
47 generally find that ‘large-effect’ alleles, which strongly affect a trait, are the first to  
48 spread and fix while ‘small-effect’ alleles take much longer to reach high frequencies  
49 (de Vladar and Barton, 2014; Wollstein and Stephan, 2014; Jain and Stephan, 2015,  
50 2017a, 2017b; Stetter et al., 2018; Thornton, 2019; Hayward and Sella, 2019).  
51 Furthermore, if epistasis exists between variants, many selected alleles do not reach  
52 fixation as they eventually become deleterious (de Vladar and Barton, 2014; Jain and  
53 Stephan, 2017b). The spread of large-effect alleles may also be impeded if a faster

54 adaptive response can be otherwise realised through changes at many small-effect  
55 alleles (Lande, 1983; Chevin and Hospital, 2008; Pavlidis et al., 2012; Chevin, 2019).  
56 Alternatively, if the optimum shift is sufficiently large, then major-effect mutations that  
57 fix first can subsequently be replaced by small-effect variants over longer timescales  
58 (on the order of the population size; Hayward and Sella (2019)). Overall, only a small  
59 proportion of loci affected by polygenic selection are expected to fix sufficiently  
60 quickly to leave selection signatures in genomic data (Pavlidis et al., 2012; Thornton,  
61 2019).

62         Due to this difficulty, earlier methods for detecting polygenic selection focused  
63 on cases where selection favours distinct phenotypes in different populations, so trait  
64 differentiation amongst populations will be greater than expected under neutral drift.  
65 Tests for this form of selection relied on comparing  $Q_{st}$  and  $F_{st}$  statistics, which  
66 respectively measured mean genetic differentiation at the trait itself and a set of  
67 neutral loci (Whitlock, 2008; Le Corre and Kremer, 2012; Savolainen et al., 2013). Yet  
68 these methods do not determine which genomic regions are subject to selection. This  
69 situation has now changed with the increased number of genome-wide association  
70 study (GWAS) data that link genotypes and phenotypes, as exemplified by the  
71 development of large cohort studies (e.g., the UK Biobank; Bycroft et al. [2018]). The  
72 release of these data have spurred a series of studies and new methods designed  
73 specifically to detect polygenic selection. These methods usually involve determining  
74 which SNPs underlying a phenotype show correlated changes in frequency (Berg  
75 and Coop, 2014; Racimo et al., 2018; Sanjak et al., 2018; Josephs et al., 2019; Berg  
76 et al., 2019; Berg et al., 2019a; Uricchio et al., 2019; Edge and Coop, 2019; Wieters  
77 et al., 2020); which sets of alleles are associated with certain environmental or  
78 climatic variations (Coop et al., 2010; Turchin et al., 2012; Robinson et al., 2015;

79 Yeaman et al., 2016; Exposito-Alonso et al., 2018; Zan and Carlborg, 2018; Exposito-  
80 Alonso et al., 2019; Ehrlich et al., 2020); or determining which SNPs explain a large  
81 fraction of phenotypic variance and trait heritability (Zhou et al., 2013; Yang et al.,  
82 2015; Gazal et al., 2017; Zeng et al., 2018; Schoech et al., 2019). Some of these  
83 approaches use overlapping methods.

84 Detecting recent polygenic selection is much harder, as long periods of time  
85 (number of generations on the order of the population size; Hayward and Sella, 2019;  
86 Thornton, 2019) may be needed to cause detectable frequency changes in weak-  
87 effect alleles. Over shorter timescales, these frequency changes are expected to be  
88 more modest and harder to detect (Stephan, 2016; Jain and Stephan, 2017a). A  
89 recent breakthrough in detecting these subtle changes was the development of the  
90 'Singleton Density Score' (SDS), a statistic tailored to detect recent and possibly  
91 small, but coordinated allele frequency changes over many SNPs (Field et al., 2016).  
92 Recent selection at a locus favouring one particular variant will lead to a reduction in  
93 the number of singletons (i.e., variants that are only observed once) around it. The  
94 SDS detects regions that exhibit a reduction in the density of singletons, to determine  
95 candidate regions that have been subject to recent selection. Using this approach,  
96 Field et al. (2016) found correlations between SDS scores at SNPs and their  
97 associated GWAS effect sizes for several polygenic traits in the modern UK human  
98 population, including increased height, infant head circumference and fasting insulin.  
99 Their findings suggested that these traits have been subject to recent selection  
100 during the last 75 or so generations (about 2,000 years).

101 The SDS method is ideally suited to organisms where large amount of whole-  
102 genome data are available, along with QTL or GWAS information that link genotypes  
103 to phenotypes, and a means to correct for population stratification (as it can generate

104 spurious associations between SNPs and trait variation). The last point is important  
105 as several recent studies, including the SDS analyses, reported evidence that  
106 increased height is subject to polygenic selection (Turchin et al., 2012; Berg and  
107 Coop, 2014; Robinson et al., 2015; Field et al., 2016; Racimo et al., 2018). However,  
108 recent attempts to replicate these findings on the UK Biobank dataset have failed to  
109 do so, and previous results may instead reflect unaccounted—for population structure  
110 (Novembre and Barton, 2018; Barton et al., 2019; Sohail et al., 2019; Berg et al.,  
111 2019; Uricchio et al., 2019; Edge and Coop, 2019).

112 Domesticated species are attractive systems for studying recent selection, as  
113 selected phenotypes are often already known, and these species are subject to  
114 large—scale sequencing studies. Population structure can also be controlled for by  
115 focusing on specific breeds. Investigating the genetic architecture underlying rapid  
116 selection in these species is also important to determine how they respond to  
117 agricultural practices, and uncover selection targets that can be used to improve  
118 breeding programs (Georges et al., 2018). Domestic cattle *Bos taurus* has been  
119 subject to intensive genomics analyses to improve artificial selection for traits that are  
120 beneficial for human use, including milk protein yield and stature (Hayes et al., 2009;  
121 Meuwissen et al., 2013; Wray et al., 2019). These traits are influenced in part by an  
122 individual's genome; heritability estimates of milk protein content range between 28  
123 and 70% (Buitenhuis et al., 2016 and references therein), while stature estimates  
124 range between 25 and 85% (Nelsen et al., 1986; Northcutt and Wilson, 1993).  
125 Previous selection scans on *B. taurus* reported individual regions that were likely to  
126 be subject to recent selection, some of which were close to genetic regions for  
127 stature and milk protein content (Lemay et al., 2009; MacEachern et al., 2009;  
128 Qanbari et al., 2010; Boitard and Rocha, 2013; Qanbari et al., 2014; Zhao et al.,

129 2015; Boitard et al., 2016a; Bouwman et al., 2018). However, stature and milk protein  
130 content are polygenic traits, with several genetic regions and QTLs associated with  
131 each (Lemay et al., 2009; Boitard et al., 2016a; Bouwman et al., 2018).

132 Here, we applied a modified version of the SDS method to whole–autosome  
133 sequencing data from 102 *B. taurus* Holstein individuals. We first determined genetic  
134 regions that have been subject to recent directional selection, and subsequently  
135 tested if evidence exists for recent selection acting on a set of regions underlying  
136 either milk protein content or stature in this breed.

137

## 138 **Results**

### 139 *Methods outline*

140 Figure 1 outlines the filtering steps applied to the 102 whole–autosome  
141 genotypes. We retained bi–allelic SNPs that had a sensible level of coverage and did  
142 not lie in putatively over–assembled regions (i.e., duplicated sections that caused  
143 many reads to assemble at a specific genetic location). Over–assembled regions are  
144 highly heterozygous with elevated coverage, and can exhibit false signatures of  
145 recent selection. We also obtained a set of singletons and filtered them to retain high  
146 quality variants where both alleles were equally well covered, to remove potentially  
147 erroneous calls.

148 SDS reflects the log–ratio of inferred tip lengths (and hence singleton  
149 densities) around one allele over another at a locus. Field et al. (2016) applied the  
150 statistic to polarised data where the ancestral and derived alleles were determined  
151 with high confidence. In that case, increased SDS values reflected selection  
152 favouring younger, derived SNPs over ancestral variants. However, for many species  
153 there is uncertainty around which SNPs are ancestral or derived (Keightley and

154 Jackson, 2018). Hence, we instead focused on the absolute value of standardized  
155 SDS statistics, which we denote as  $asSDS$ . As the original SDS measurement is a log-  
156 ratio, then  $asSDS$  values reflect the relative increase of one SNP (either ancestral or  
157 derived), and hence a change in inferred tip lengths, over the other. This statistic is a  
158 broader measure of polygenic selection, as opposed to a specific test for positive  
159 selection acting on younger derived variants. Further details are available in the  
160 *Methods* section.

161

### 162 *Estimating timescale of selection*

163 We first determined the timescale over which we expect to detect selection in  
164 our sample using the SDS method. SDS measures the changes in singleton numbers  
165 around putatively selected SNPs, relative to background numbers in the absence of  
166 selection. As singletons arise on the tips of the underlying gene trees, the average tip  
167 length in the genealogy of sequenced samples determines the timescale over which  
168 the SDS detects a signal (Field et al., 2016). To calculate the mean tip age, we  
169 simulated gene genealogies under two scenarios. We first simulated the Holstein  
170 population demography inferred by Boitard et al. (2016b), which suggested that this  
171 population experienced a sudden decline in effective population size ( $N_e$ ) since  
172 domestication, but with a present-day  $N_e$  (~793) that is much larger than that inferred  
173 from pedigree data (49; Table 2 of Sørensen et al. (2005), estimate for 1993–2003)  
174 or from temporal variation in SNP frequencies (48; Jiménez–Mena et al. 2016).  
175 Hence, we also simulated genealogies under a second model that used the Boitard  
176 et al. (2016b) demographic model but with the present-day  $N_e$  set to 49. These  
177 scenarios will be referred to as the ‘High  $N_e$ ’ and ‘Low  $N_e$ ’ models, respectively.

178 Figure 2 shows simulation results. Depending on the assumed present-day



179  $N_e$ , the tip length in our sample of 204 alleles (i.e., assuming two per diploid  
180 individual) goes back either 65 or 148 generations. Assuming 5 years per generation  
181 (Boitard et al., 2016b), this time scale corresponds to between 325 and 740 years  
182 ago. Since *B. taurus* domestication started around 10,000 years ago (Zeder, 2008)  
183 the sample size used in this study will only capture selection acting in the very recent  
184 past that is more relevant for breed formation, rather than selection during *B. taurus*  
185 domestication.

186 We will focus on detecting selection signatures assuming the high  $N_0$  model.  
187 Results using the low  $N_0$  model to calibrate scores were broadly similar. They are  
188 outlined in the Supplementary Text; we will highlight when differences arise.

189

## 190 *Genome-wide asSDS*

191 Figure 3 plots asSDS values (at SNPs with minor allele frequency greater than  
192 5%) across all autosomes, excluding chromosome 25 (due to an insufficient number  
193 of singletons needed to obtain SDS scores after filtering). Many SNPs have elevated  
194 asSDS scores (1051 SNPs at  $FDR < 0.05$ ; 2112 for the low  $N_0$  model). Several  
195 regions contain SNPs with significantly high asSDS values (Bonferroni-corrected  $P <$   
196  $0.05$ ; actual  $P < \sim 2.5e-8$ ). To further investigate potential selection targets, we looked  
197 for genes that either overlapped significant SNPs or lay 10kb up- or downstream of  
198 them. Linkage disequilibrium (LD), as measured by  $r_2$ , decays to around 0.2 over  
199 50kb in Danish Holstein breeds (Buitenhuis et al., 2016), so genes within 10kb  
200 should be in LD with regions harbouring high asSDS scores. Table 1 lists these  
201 genes; there is some overlap between results obtained using either a high or low  $N_0$ ,  
202 but more gene targets are present under the low  $N_0$  model. Most of these genes are  
203 of unknown function; the results also include unnamed genes and a snRNA. *FBXO4*,

204 *MANBA* are involved in protein regulation, while *PPM1L* is involved with cellular  
205 regulation and the activation of stress-activated protein kinases. *TRIM9* and *NRXN1*  
206 are involved in the synaptic system. *GHR* is linked to both body growth and milk  
207 yield, and has been reported in previous selection studies (Qanbari et al., 2010; Zhao  
208 et al., 2015). SNPs with significantly elevated scores are also found on chromosome  
209 23 near the MHC region, which may reflect over-dominant selection. All Bonferroni-  
210 significant SNPs were removed from subsequent tests of recent polygenic selection.  
211 Figure S1 shows results for the low  $N_0$  model.

212

### 213 *Testing for polygenic selection acting on milk protein and stature*

214 We collated asSDS scores of SNPs that either lie in genetic regions  
215 associated with milk proteins (as outlined in Lemay et al. [2009]), or those that lie  
216 close to stature QTLs (Bouwman et al., 2018). The latter were inferred from a meta-  
217 analysis of GWAS studies conducted in seven Holstein populations, but not every  
218 QTL had an effect size reported in each population. We hence investigated two  
219 overlapping consensus QTL sets, where an effect size was either reported in at least  
220 6 of 7 populations (yielding 42 QTLs with asSDS scores associated with them), or  
221 where effect sizes were reported in at least 5 of 7 populations (58 QTLs had asSDS  
222 scores). We used a generalized linear model (GLM) to determine whether genome  
223 regions containing either milk protein genes or stature QTLs are associated with  
224 differences in asSDS scores.

225 Figure 4 shows the distribution of asSDS values for SNPs that lies either in  
226 milk protein genes, or close to stature QTLs, compared to the background genome-  
227 wide distribution of asSDS scores. A GLM analysis shows that while several  
228 chromosomes and allele frequency bins are significant predictors of asSDS variation,

229 the presence of a SNP in a milk protein gene does not explain any additional  
230 variation (effect size = 0.0212,  $P = 0.107$ ; see Table S1 for the full results). SNPs  
231 near stature QTLs do not have significantly different asSDS values, irrespective of  
232 whether we use QTLs with reported effect sizes in at least 6 of 7 Holstein populations  
233 (effect =  $-0.210$ ,  $P = 0.122$ ; Figure 4(b), Table S2), or with effect sizes reported in at  
234 least 5 of 7 Holstein populations (effect =  $-0.151$ ,  $P = 0.208$ ; Figure S2 and Table  
235 S3).

236 Under the low  $N_0$  model, milk protein genes have slightly elevated asSDS  
237 values (effect size = 0.0489,  $P = 0.000261$ ; Figure S3, Table S4), but stature QTLs do  
238 not (Figure S3; see Tables S5, S6 for effect sizes and  $P$ -values). However, each  
239 genetic region contains several SNPs with asSDS scores that are correlated because  
240 of linkage disequilibrium (LD). To account for LD within genes, and thereby obtain a  
241 more reliable  $P$ -value associated with elevated asSDS scores, we performed a  
242 permutation test where milk-protein genes were randomly distributed along the  
243 genome. We subsequently measured the additional variance predicted by the  
244 presence or absence of these genes in the permuted datasets (see Methods for  
245 details). The observed amount of variance explained in the original data is then  
246 compared to the set of values observed for permuted data. In all cases the  
247 observed value lies within the permuted values (Figure S4). We therefore conclude  
248 that milk-protein genes as a whole do not harbour SNPs with significantly different  
249 asSDS scores compared to the rest of the genome. Permutation results were also  
250 non-significant when applied to stature QTLs (Figure S4).

## 251 **Discussion**

### 252 *Summary of results*

253 We have analysed an extensive *B. taurus* genomic dataset to identify  
254 signatures of recent selection, and to determine whether the data contained a signal  
255 of polygenic selection acting on milk proteins and QTLs underlying phenotypic  
256 variation in stature. Given the sample size and the demographic history of the  
257 Holstein breed, our simulations suggested that the SDS method can detect very  
258 recent selection events, arising no more than approximately 740 years ago (Figure  
259 2). A whole-genome scan for asSDS scores identified several targets of recent  
260 directional selection that overlap or lie close to protein-coding genes (Figure 3; Table  
261 1). When the functions of these genes are known, they are involved in protein  
262 regulation, the synaptic system, and body growth. Significant values were also  
263 observed in the MHC region. We subsequently investigated whether either milk  
264 protein genes or SNPs near stature QTLs collectively showed evidence of polygenic  
265 selection. We did so by testing whether SNPs in these two groups are significantly  
266 associated with changes in asSDS values. However, asSDS values are only different  
267 in the presence of milk-protein genes when assuming a small  $N_0$ , and this difference  
268 is not significant when performing a permutation test (Figure S4). Hence, while  
269 asSDS could reveal specific instances of recent selection, tests based on collective  
270 scores of variants associated with known selected traits yielded no signal of  
271 polygenic selection.

272

### 273 *Potential reasons for a lack of polygenic selection signal*

274 While the SDS method detected individual candidate genes for very recent  
275 selection, we were unable to find strong evidence for polygenic selection acting on

276 two traits that are important for human use, which were subject to artificial selection  
277 since domestication. One potential reason for this lack of signal is that selection on  
278 these traits was mainly driven by major-effect mutations that have already fixed in  
279 the population, with a smaller contribution from minor effect mutations. Theoretical  
280 models have shown that more major-effect QTLs are likely to fix if the population lies  
281 further from a fitness optimum (Lande, 1983; Jain and Stephan, 2017b; Thornton,  
282 2019). Domesticated species, which experience strong directional artificial selection,  
283 could thereby fix more adaptive mutation via sweep-like processes compared to  
284 populations evolving in more stable environments (Lande, 1983; Jain and Stephan,  
285 2017a). Furthermore, once a population has adapted to a new environment (the  
286 domestication phenotype in this case), then any remaining major-effect mutations  
287 are likely to be superseded by variants with weaker effects, which are harder to  
288 detect (Hayward and Sella, 2019). Simulations (Figure 2) suggested that SDS values  
289 obtained from our sample of 102 individuals will principally detect very recent  
290 selection related to breed formation and subsequent within-breed selection, rather  
291 than selection arising from domestication that was more likely to involve the  
292 promotion and fixation of major-effect mutations. Finally, the response to polygenic  
293 selection is weakened in smaller populations (John and Stephan, 2020), which will  
294 further hamper our ability to detect it in *B. taurus*.

295 Detecting polygenic selection through singleton densities is also made harder  
296 by potentially reduced tip lengths in *B. taurus*, which likely reflects successive  
297 bottlenecks due to domestication, breed formation and intense recent selection. The  
298 effective population size of many *B. taurus* breeds appears to have undergone a  
299 decline since domestication (Sørensen et al., 2005; Boitard et al., 2016b).

300 Contracting populations produce gene genealogies with very short tip lengths

301 (Harpending et al., 1998). Hence it will be harder to detect differences between the  
302 tip lengths of two SNPs if the baseline tip length is already very short. A reduction in  
303 baseline singleton numbers also reduces the power to investigate asSDS values in  
304 telomeric regions. SDS values are calculated using the distance up- and downstream  
305 from a SNP to the nearest singleton, and are undefined if a certain number of  
306 samples do not harbour singletons in either direction (Field et al., 2016). SDS values  
307 are hence less likely to be defined in telomeric regions, as it is generally less feasible  
308 to observe singletons up until the end of the chromosome. This problem is  
309 exacerbated if there are few singletons overall.

310         The lack of a polygenic selection signal in this study also resonates with recent  
311 discussions surrounding the strength of the evidence for it in humans. Although there  
312 are larger numbers of high-quality genotypes available, recent claims of polygenic  
313 selection are likely to have been confounded by population stratification (Novembre  
314 and Barton, 2018; Barton et al., 2019; Sohail et al., 2019; Berg et al., 2019; Uricchio  
315 et al., 2019; Edge and Coop, 2019), suggesting that it is inherently difficult to detect  
316 polygenic selection from genome sequence data. One potential solution to increase  
317 power is to use recent methods to directly infer trees, and hence singleton branches,  
318 from genome data (Edge and Coop, 2019; Speidel et al., 2019). An alternative  
319 approach would be to look beyond sequence data and focus on gene networks. The  
320 recently-proposed ‘omnigenic’ model (Boyle et al., 2017; Liu et al., 2019) posits that  
321 variation in quantitative traits is principally affected by a plethora of ‘peripheral’ genes  
322 that indirectly affect them, rather than a limited set of ‘core’ genes that directly modify  
323 a trait. These numerous peripheral genes may exert their influence via regulatory  
324 effects (e.g., gene expression changes), but are also expected to be highly  
325 pleiotropic. Although fully testing the omnigenic model will require larger datasets and

326 novel experimental designs (Wray et al., 2018), there is nascent evidence that gene  
327 regulation may underlie directional polygenic selection. Boitard et al. (2016a) found  
328 that some adaptive signatures of *B. taurus* are located in intergenic regions;  
329 regulatory changes were also proposed to guide polygenic selection in *Arabidopsis*  
330 (He et al., 2016). Analyses of gene-sets associated with infection responses or  
331 immunity also found evidence for polygenic selection in humans and primates (Daub  
332 et al., 2013, 2017; Svoldal et al., 2017). Immunity gene-sets might be exceptional  
333 cases, as they are more likely to contain genes subject to very strong selection  
334 (Castellano et al., 2019). Further investigations using regulatory information and a  
335 broader range of gene-sets could be a promising approach to determine the impact  
336 of polygenic selection.

## 337 **Materials and Methods**

### 338 *Simulating Holstein demography*

339 Neutral genealogies were simulated using *msprime* (Kelleher et al., 2016) to  
340 determine the mean tip length, and hence the background distribution of SDS in the  
341 absence of selection. We either simulated the Holstein population demography  
342 inferred by Boitard et al. (2016b), rounding estimated population sizes to the nearest  
343 integer, or with the present-day  $N_e$  equal to 49 (Sørensen et al., 2005). We refer to  
344 these outputs as the ‘High  $N_e$ ’ and ‘Low  $N_e$ ’ models. 1,000 simulations were  
345 performed for each number of samples, ranging from 10 to 1,050. The mean tip  
346 length was calculated over all 1,000 simulations; 95% confidence intervals were  
347 calculated from 1,000 bootstraps. We fitted a linear model to the log of mean tip  
348 length against the log number of samples, and used it to predict the average tip age  
349 for 204 alleles, which is the number of diploid haplotypes used in the study. *B. taurus*  
350 are somewhat inbred (Sørensen et al., 2005), which increases within-individual  
351 relatedness, and could reduce the unique number of alleles (see Nordborg and  
352 Donnelly [1997] for an example with self-fertilisation). Estimates of the inbreeding  
353 coefficient  $F$  (Wright, 1951), which measure the reduction in heterozygosity, range  
354 from  $-0.15$  to  $0.35$ , with a mean of  $0.059$  (Figure S5; methods outlined below). Given  
355 this low mean value, we assumed two unique alleles per individual.

356

### 357 *Genome Data Extraction*

358 Whole genome sequencing for 102 Holstein bulls and cows were done by  
359 Illumina and BGI short read sequencing in various laboratories. Bulls were selected  
360 for sequencing had high genetic representation in the present-day Holstein  
361 population. Sequencing of close relatives was avoided. Individuals were born



362 between approximately 1980 and 2010. DNA was extracted from tissue, blood, or  
363 semen samples. DNA was sequenced using either BGI technology or on various  
364 Illumina platforms. Sequencing was performed using paired-end sequencing with  
365 most animals sequenced with read lengths of 100 basepairs. No raw reads were  
366 shorter than 90 basepairs. Read data were processed according to the 1,000 Bull  
367 Genomes Project (Daetwyler et al., 2014). Briefly, data were trimmed and quality  
368 filtered using Trimmomatic version 0.38 (Bolger et al., 2014). Reads were aligned to  
369 the ARS-UCD-1.2 bovine genome assembly (Rosen et al., 2018)  
370 ([https://sites.ualberta.ca/~stothard/1000\\_bull\\_genomes/ARS-](https://sites.ualberta.ca/~stothard/1000_bull_genomes/ARS-UCD1.2_Btau5.0.1Y.fa.gz)  
371 [UCD1.2\\_Btau5.0.1Y.fa.gz](https://sites.ualberta.ca/~stothard/1000_bull_genomes/ARS-UCD1.2_Btau5.0.1Y.fa.gz)) with the *B. taurus* Y chromosome assembly from BTau-  
372 5.0.1 added. Alignment was performed with bwa version 0.17 (Li and Durbin, 2009).  
373 Samtools (Li et al., 2009) was used for sorting and marking of PCR duplicates. Base  
374 qualities were recalibrated using Genome Analysis Toolkit (GATK; McKenna et al.  
375 [2010]) version 3.8 using a set of known variable sites (Schnabel and Chamberlain,  
376 *unpubl*). GVCF files were formed using GATK's Haplotype Caller. Genotypes were  
377 called using GATK's GenotypeGVCFs.

378

### 379 *Initial filtering*

380 Figure 1 outlines a schematic of the data filtering. We first used *VCFtools*  
381 (Danecek et al., 2011) to obtain a baseline list of biallelic sites containing at least one  
382 minor allele, and removed indels and sites where the genotype was unknown in any  
383 individual. For each autosome, we obtained the mean depth for each remaining site  
384 using *VCFtools*' '--site-mean-depth' option. Figure S6 shows the depth distribution for  
385 these sites after initial filtering. We fitted a Poisson distribution to these data that had  
386 the same mean (9.76) as observed in the dataset. We determined the expected

387 coverage range based on the 99.5% quantile range of the fitted distributions, which  
388 equalled 2 to 20. We subsequently removed sites that had mean coverage outside  
389 this range. This filtering retained 6,873,371 of 20,010,175 initial variants (all entries in  
390 each autosome VCF file, including indels), which was denoted the ‘filtered’ dataset.

391

### 392 *Finding putatively over-assembled regions*

393 Scaffolds of different genetic segments which each carry highly identical  
394 repeated regions can be ‘over-assembled’, where very similar chromosome regions  
395 were anchored to a single location (Chaisson et al., 2015). These over-assembled  
396 regions (OARs) manifest themselves in the assembled sequence as having high  
397 levels of heterozygosity, sequence similarity, and coverage. If not corrected for, they  
398 can be misclassified as selected sites (e.g., subject to partial sweeps or balancing  
399 selection). We used a sliding window method to identify putative OARs in the  
400 dataset. For each chromosome, in each window we calculated (i) the number of sites  
401 where the reference allele has frequency between 49% – 51%, (ii) the mean  
402 heterozygosity for each SNP (defined as the number of heterozygotes among the  
403 102 individuals), and (iii) the mean summed allele depth. We used overlapping  
404 windows, each of size 500 SNPs with a step size of 10 SNPs. We first analysed all  
405 chromosomes to determine the distribution of values produced per window. We then  
406 re-ran the analyses, classifying windows as OARs if values for all three statistics  
407 belonged to the top 99.5% of their respective distributions, merging overlapping  
408 windows. We subtracted 1 from the start position of each region so that the leftmost  
409 boundary would also be excluded (if using ‘--bed-exclude’ in *VCFtools*). Figure S7  
410 shows an example where a region at the beginning of chromosome 1 was identified  
411 as an OAR. Overall, 5 OARs comprising 5,880 SNPs were identified (Table S7),

412 which were subsequently masked from the rest of the pipeline.

413

#### 414 *Calculating inbreeding coefficients*

415 Inbreeding coefficients were estimated using the '--het' option of *VCFtools*,  
416 which reports  $F$ -statistics for each chromosome per individual. Individual  $F$ -values  
417 (Figure S5) were calculated by taking the mean over all chromosomes, weighted by  
418 the chromosome size.

419

#### 420 *Obtaining SDS analysis inputs*

421 **Test SNPs:** Focal SNPs were those with an alternate allele frequency  
422 between 5% and 95%, and where each genotype was observed at least once  
423 amongst all samples. 3,602,500 SNPs were retained for testing.

424 **Singletons:** Raw singleton data was extracted from the filtered Holstein  
425 dataset using *VCFtools*' '--singleton' option. This option identified both true singletons  
426 and private doubletons (i.e., where an allele is unique to an individual but present as  
427 a homozygote). Only true singletons were retained for analyses. To test whether a  
428 singleton had the same coverage as the non-singleton allele, we extracted the  
429 sequence depth for both alleles and retained sites satisfying the following criteria.  
430 First, the total allele depth was between 2 and 20 inclusive. Second, either (a) if the  
431 summed depth over both alleles exceeded 5, then the binomial probability of the  
432 observed allele depth exceeded 0.1; or (b) a stricter manual cut-off was applied if the  
433 total allele depth equalled 5 or less. Table S8 outlines the cut-off values used;  
434 554,402 of 765,822 singletons were subsequently retained.

435 **Other parameters:** The SDS method requires a 'singleton observability'  
436 probability, to predict how likely it is that a singleton will be detected by genome

437 sequencing. Following Field et al. (2016) we used the mean depth per individual,  
438 obtained using the '--depth' option in *VCFtools*. It was also necessary to state the  
439 genetic boundaries between which analyses were carried out; we used a starting  
440 point of 1 and end points equal to the reported size of each autosome in *B. taurus*, as  
441 obtained from the ARS–UCD 1.2 genome assembly  
442 ([https://www.ncbi.nlm.nih.gov/genome/?term=txid9913\[orgn\]](https://www.ncbi.nlm.nih.gov/genome/?term=txid9913[orgn])).

443 Raw SDS values were calculated by fitting a gamma distribution to observed  
444 singleton distances, and comparing it to the expected distribution for the neutral  
445 case. We used the scripts provided by Field et al. (2016)  
446 (<https://github.com/yairf/SDS>) to generate the expected shape values for the gamma  
447 distribution for both the high and low  $N_0$  models. Finally, we used value of  $10^{-7}$  to  
448 initiate the search for a maximum value in likelihood space.

449

#### 450 *Calculating SDS scores and their significance for individual SNPs*

451 Out of 3,602,500 input SNPs, we retained and assigned scores to 1,983,571  
452 of these. SDS scores were not assigned to a SNP if more than 5% of individuals did  
453 not harbour any singletons upstream or downstream of the SNP. This cut–off tended  
454 to exclude SNPs in telomeric regions. Furthermore, SDS scores were not calculated  
455 for chromosome 25 as an insufficient number of singletons were present across all  
456 individuals after data filtering.

457 Raw SDS scores were standardized using 18 bins, based on alternate allele  
458 frequencies at the scored SNP (i.e., from 5% to 10%, from 10% to 15%, etc.). SDS  
459 scores were normalised by subtracting the bin mean score from individual measures,  
460 and dividing by the bin standard deviation. We subsequently took the absolute value  
461 of standardized scores, which are referred to as SDS statistics.  $P$ -values for each

462 asSDS value were obtained from a half-normal distribution.

463 Statistical analyses were carried out in R (R Core Team, 2019). The false-  
464 discovery rate (FDR) of each SNP was calculated using the 'qvalue' package (Storey  
465 et al., 2019); we highlighted SNPs with an FDR of less than 0.05. Significance was  
466 determined using a Bonferroni corrected  $P$ -value cut-off of  $0.05/(1,983,571) \approx 2.5 \times$   
467  $10^{-8}$ .

468

### 469 *Data sources*

470 A GTF gene annotation file for the ARS-UCD 1.2 assembly was downloaded  
471 from Ensembl (available from [https://www.ensembl.org/Bos\\_taurus/Info/Index](https://www.ensembl.org/Bos_taurus/Info/Index)).  
472 Bedtools v2.29.0 (Quinlan and Hall, 2010) was used to obtain genetic annotations  
473 10kb up- and downstream of each Bonferroni-significant SNP (overlapping windows  
474 were merged).

475 A list of milk protein genes was obtained from Lemay et al. (2009), which was  
476 based on proteins identified in milk in two comprehensive proteomic studies  
477 (Reinhardt and Lippolis, 2006; Smolenski et al., 2007). The position of these genes in  
478 the ARS-UCD 1.0.25 assembly were then determined by either locating the gene  
479 name in the *B. taurus* database, or using BLAST to locate the human homologue in  
480 the cattle genome. Out of 198 initial genes, new locations were obtained for 191 of  
481 them. 180 were subsequently retained after removing those located on chromosome  
482 25, the X chromosome, and those with unknown chromosome location.

483 Stature QTLs were obtained from Bouwman et al. (2018), which identified 164  
484 QTLs in several *B. taurus* breeds, including 7 Holstein populations from different  
485 countries. We initially extracted 114 QTLs for which an effect was inferred from at  
486 least 5 of 7 Holstein populations. Positions were given relative to the UMD 3.1

487 assembly; we subsequently extracted sequence 100bp up- and downstream of the  
488 position and remapped to ARS-UCD 1.0.25. 106 QTLs were re-aligned without  
489 gaps; of the remaining 8, 4 were located close to rearrangements and discarded,  
490 while the remaining 4 were kept. After removing those on chromosome 25, 107 QTLs  
491 were retained for downstream analysis.

492 We analysed this full QTL set and a subset where effect sizes were reported in  
493 6 of 7 Holstein breeds (containing 78 QTLs). Some QTLs lie at the beginning or the  
494 end of chromosomes, where asSDS scores were not available. These QTLs were not  
495 considered further; for the remaining QTLs, we identified the SNP nearest to it and  
496 assigned the asSDS value at that site to the QTL. Overall, asSDS values were  
497 assigned to 58 QTLs with effect sizes in at least 5 of 7 Holstein populations, and 42  
498 QTLs with effect sizes in at least 6 of 7 Holstein populations.

499

## 500 *Statistical analyses*

501 To determine which factors explain variation in asSDS scores, we applied a  
502 generalized linear model as implemented using the `glm()` function in R, with a  
503 Gamma link family and inverse link function. We compared models that either  
504 included or excluded the trait of interest, of the following form:

505

506  $H_0: \text{asSDS} \sim \text{Chr} + \text{AAF}$

507  $H_1: \text{asSDS} \sim \text{Chr} + \text{AAF} + \text{Trait}$

508

509 'Chr' is the effect of the chromosome where the SNP resided; AAF denotes  
510 the effect of the bin of alternate allele frequency that was used to standardize raw  
511 SDS data (e.g., bin 1 denoted those with frequency between 5 and 10%). For the

512 milk protein analysis, a 'Trait' value of 1 indicated that the SNP lies within a milk  
513 protein gene; for the stature QTL analyses, 1 indicates a SNP that is closest to a  
514 confirmed stature QTL. Otherwise 'Trait' was set to zero. All variables are categorical.  
515 Significance of the 'Trait' factor was determined by comparing the deviance of  
516 models  $H_0$  and  $H_1$  using a likelihood ratio test (LRT).  $P$ -values were calculated  
517 assuming that the LRT statistic was  $\chi^2_{12}$  under  $H_0$ .

518 To implement the permutation test for milk-protein genes, a random set of  
519 non-overlapping regions were designated as associated with milk-proteins. The  
520 number of regions defined equalled the actual number of milk-protein genes, and  
521 each region had the same length as one of the milk-protein genes. For stature QTLs,  
522 random positions were defined as being associated with stature; the number of  
523 positions equalled the number of QTLs that were initially analysed, accounting for the  
524 number of breeds in which a QTL effect size was reported in. The LRT was applied to  
525 GLM results applied to the randomised datasets, and the deviance (a measure of  
526 how much additional variation is explained by the 'Trait' term in  $H_1$ ) was noted. The  
527 process was repeated 1,000 times.  $P$ -values were calculated from the proportion of  
528 deviance values that exceed the observed deviance in the actual dataset.

529  
530 **Acknowledgements.** We would like to thank Simon Boitard for sharing his  
531 results on *B. taurus* demographic inference. MH is supported by a NERC  
532 Independent Research Fellowship (NE/R015686/1). NAP, BG and TB are funded by  
533 a synergistic research grant from the Faculty of Science and Technology, Aarhus  
534 University, Denmark. MH and TB also acknowledge financial support from the  
535 European Research Council under the European Union's Seventh Framework  
536 Program (FP7/20072013, ERC Grant 311341).

## 537 **References**

- 538 Barton NH, Etheridge AM, Véber A. 2017. The infinitesimal model: Definition,  
539 derivation, and implications. *Theor Popul Biol* **118**:50–73.  
540 doi:10.1016/j.tpb.2017.06.001
- 541 Barton NH, Hermisson J, Nordborg M. 2019. Why structure matters. *eLife* **8**:e45380.  
542 doi: 10.7554/eLife.45380
- 543 Barton NH, Keightley PD. 2002. Understanding quantitative genetic variation. *Nat*  
544 *Rev Genet* **3**:11–21. doi: 10.1038/nrg700
- 545 Berg JJ, Coop G. 2014. A Population Genetic Signal of Polygenic Adaptation. *PLoS*  
546 *Genet* **10**:e1004412. doi: 10.1371/journal.pgen.1004412
- 547 Berg JJ, Harpak A, Sinnott-Armstrong N, Joergensen AM, Mostafavi H, Field Y, Boyle  
548 EA, Zhang X, Racimo F, Pritchard JK, Coop G. 2019. Reduced signal for  
549 polygenic adaptation of height in UK Biobank. *eLife* **8**:e39725. doi:  
550 10.7554/eLife.39725
- 551 Berg JJ., Zhang X, Coop G. 2019. Polygenic Adaptation has Impacted Multiple  
552 Anthropometric Traits. *bioRxiv* 167551. doi: 10.1101/167551
- 553 Boitard S, Boussaha M, Capitan A, Rocha D, Servin B. 2016a. Uncovering  
554 Adaptation from Sequence Data: Lessons from Genome Resequencing of  
555 Four Cattle Breeds. *Genetics* **203**:433–450. doi: 10.1534/genetics.115.181594
- 556 Boitard S, Rocha D. 2013. Detection of signatures of selective sweeps in the Blonde  
557 d'Aquitaine cattle breed. *Anim Genet* **44**:579–583. doi: 10.1111/age.12042
- 558 Boitard S, Rodríguez W, Jay F, Mona S, Austerlitz F. 2016b. Inferring Population Size  
559 History from Large Samples of Genome-Wide Molecular Data - An  
560 Approximate Bayesian Computation Approach. *PLoS Genet* **12**:e1005877. doi:  
561 10.1371/journal.pgen.1005877



- 562 Bolger AM, Lohse M, Usadel B. 2014. Trimmomatic: a flexible trimmer for Illumina  
563 sequence data. *Bioinformatics* **30**:2114–2120.  
564 doi:10.1093/bioinformatics/btu170
- 565 Bouwman AC, Daetwyler HD, Chamberlain AJ, Ponce CH, Sargolzaei M, Schenkel  
566 FS, Sahana G, Govignon-Gion A, Boitard S, Dolezal M, Pausch H, Brøndum  
567 RF, Bowman PJ, Thomsen B, Guldbbrandtsen B, Lund MS, Servin B, Garrick  
568 DJ, Reecy J, Vilkki J, Bagnato A, Wang M, Hoff JL, Schnabel RD, Taylor JF,  
569 Vinkhuyzen AAE, Panitz F, Bendixen C, Holm L-E, Gredler B, Hozé C,  
570 Boussaha M, Sanchez M-P, Rocha D, Capitan A, Tribout T, Barbat A, Croiseau  
571 P, Drögemüller C, Jagannathan V, Vander Jagt C, Crowley JJ, Bieber A,  
572 Purfield DC, Berry DP, Emmerling R, Götz K-U, Frischknecht M, Russ I,  
573 Sölkner J, Van Tassell CP, Fries R, Stothard P, Veerkamp RF, Boichard D,  
574 Goddard ME, Hayes BJ. 2018. Meta-analysis of genome-wide association  
575 studies for cattle stature identifies common genes that regulate body size in  
576 mammals. *Nat Genet* **50**:362–367. doi: 10.1038/s41588-018-0056-5
- 577 Boyle EA, Li YI, Pritchard JK. 2017. An Expanded View of Complex Traits: From  
578 Polygenic to Omnigenic. *Cell* **169**:1177–1186. doi: 10.1016/j.cell.2017.05.038
- 579 Buitenhuis B, Poulsen NA, Gebreyesus G, Larsen LB. 2016. Estimation of genetic  
580 parameters and detection of chromosomal regions affecting the major milk  
581 proteins and their post translational modifications in Danish Holstein and  
582 Danish Jersey cattle. *BMC Genet* **17**:114. doi:10.1186/s12863-016-0421-2
- 583 Bycroft C, Freeman C, Petkova D, Band G, Elliott LT, Sharp K, Motyer A, Vukcevic D,  
584 Delaneau O, O'Connell J, Cortes A, Welsh S, Young A, Effingham M, McVean  
585 G, Leslie S, Allen N, Donnelly P, Marchini J. 2018. The UK Biobank resource  
586 with deep phenotyping and genomic data. *Nature* **562**:203–209. doi:

- 587 10.1101/250191
- 588 Castellano D, Uricchio LH, Munch K, Enard D. 2019. Viruses rule over adaptation in  
589 conserved human proteins. *bioRxiv* 555060. doi: 10.1101/555060
- 590 Chaisson MJP, Wilson RK, Eichler EE. 2015. Genetic variation and the *de novo*  
591 assembly of human genomes. *Nat Rev Genet* **16**:627–640. doi:  
592 10.1038/nrg3933
- 593 Charlesworth B, Edwards AWF. 2018. A century of variance. *Significance* **15**:20–25.  
594 doi: 10.1111/j.1740-9713.2018.01170.x
- 595 Chevin L-M. 2019. Selective Sweep at a QTL in a Randomly Fluctuating  
596 Environment. *Genetics* **213**:987–1005. doi:10.1534/genetics.119.302680 doi:  
597 10.1534/genetics.119.302680
- 598 Chevin L-M, Hospital F. 2008. Selective Sweep at a Quantitative Trait Locus in the  
599 Presence of Background Genetic Variation. *Genetics* **180**:1645–1660. doi:  
600 10.1534/genetics.108.093351
- 601 Coop G, Witonsky D, Di Rienzo A, Pritchard JK. 2010. Using Environmental  
602 Correlations to Identify Loci Underlying Local Adaptation. *Genetics* **185**:1411–  
603 1423. doi: 10.1534/genetics.110.114819
- 604 Daetwyler HD, Capitan A, Pausch H, Stothard P, van Binsbergen R, Brøndum RF,  
605 Liao X, Djari A, Rodriguez SC, Grohs C, Esquerré D, Bouchez O, Rossignol  
606 M-N, Klopp C, Rocha D, Fritz S, Eggen A, Bowman PJ, Coote D, Chamberlain  
607 AJ, Anderson C, VanTassell CP, Hulsegege I, Goddard ME, Guldbbrandtsen B,  
608 Lund MS, Veerkamp RF, Boichard DA, Fries R, Hayes BJ. 2014. Whole-  
609 genome sequencing of 234 bulls facilitates mapping of monogenic and  
610 complex traits in cattle. *Nat Genet* **46**:858–865. doi: 10.1038/ng.3034
- 611 Danecek P, Auton A, Abecasis G, Albers CA, Banks E, DePristo MA, Handsaker RE,

- 612 Lunter G, Marth GT, Sherry ST, McVean G, Durbin R. 2011. The variant call  
613 format and VCFtools. *Bioinformatics* **27**:2156–2158. doi:  
614 10.1093/bioinformatics/btr330
- 615 Daub JT, Hofer T, Cutivet E, Dupanloup I, Quintana-Murci L, Robinson-Rechavi M,  
616 Excoffier L. 2013. Evidence for Polygenic Adaptation to Pathogens in the  
617 Human Genome. *Mol Biol Evol* **30**:1544–1558. doi: 10.1093/molbev/mst080
- 618 Daub JT, Moretti S, Davydov II, Excoffier L, Robinson-Rechavi M. 2017. Detection of  
619 Pathways Affected by Positive Selection in Primate Lineages Ancestral to  
620 Humans. *Mol Biol Evol* **34**:1391–1402. doi: 10.1093/molbev/msx083
- 621 de Vladar HP, Barton N. 2014. Stability and Response of Polygenic Traits to  
622 Stabilizing Selection and Mutation. *Genetics* **197**:749–767. doi:  
623 10.1534/genetics.113.159111
- 624 Edge MD, Coop G. 2019. Reconstructing the History of Polygenic Scores Using  
625 Coalescent Trees. *Genetics* **211**:235–262. doi: 10.1534/genetics.118.301687
- 626 Ehrlich MA, Wagner DN, Oleksiak MF, Crawford DL. 2020. Rapid polygenic selection  
627 generates fine spatial structure among ecological niches in a well-mixed  
628 population. *bioRxiv* 2020.03.26.009787. doi:10.1101/2020.03.26.009787
- 629 Exposito-Alonso M, 500 Genomes Field Experiment Team, Burbano HA, Bossdorf O,  
630 Nielsen R, Weigel D. 2019. Natural selection on the *Arabidopsis thaliana*  
631 genome in present and future climates. *Nature* **573**:126–129.  
632 doi:10.1038/s41586-019-1520-9
- 633 Exposito-Alonso M, Vasseur F, Ding W, Wang G, Burbano HA, Weigel D. 2018.  
634 Genomic basis and evolutionary potential for extreme drought adaptation in  
635 *Arabidopsis thaliana*. *Nat Ecol Evol* **2**:352–358. doi: 10.1038/s41559-017-  
636 0423-0

- 637 Field Y, Boyle EA, Telis N, Gao Z, Gaulton KJ, Golan D, Yengo L, Rocheleau G,  
638 Froguel P, McCarthy MI, Pritchard JK. 2016. Detection of human adaptation  
639 during the past 2000 years. *Science* **354**:760–764. doi:  
640 10.1126/science.aag0776
- 641 Fisher RA. 1918. The correlation between relatives on the supposition of Mendelian  
642 inheritance. *Trans R Soc Edinb* **52**:399–433.
- 643 Gazal S, Finucane HK, Furlotte NA, Loh P-R, Palamara PF, Liu X, Schoech A, Bulik-  
644 Sullivan B, Neale BM, Gusev A, Price AL. 2017. Linkage disequilibrium–  
645 dependent architecture of human complex traits shows action of negative  
646 selection. *Nat Genet* **49**:1421–1427. doi: 10.1038/ng.3954
- 647 Georges M, Charlier C, Hayes B. 2018. Harnessing genomic information for livestock  
648 improvement. *Nat Rev Genet*. doi: 10.1038/s41576-018-0082-2
- 649 Harpending HC, Batzer MA, Gurven M, Jorde LB, Rogers AR, Sherry ST. 1998.  
650 Genetic traces of ancient demography. *Proc Natl Acad Sci* **95**:1961–1967. doi:  
651 10.1073/pnas.95.4.1961
- 652 Hayes BJ, Bowman PJ, Chamberlain AJ, Goddard ME. 2009. Invited review:  
653 Genomic selection in dairy cattle: Progress and challenges. *J Dairy Sci*  
654 **92**:433–443. doi: 10.3168/jds.2008-1646
- 655 Hayward LK, Sella G. 2019. Polygenic adaptation after a sudden change in  
656 environment. *bioRxiv* 792952. doi: 10.1101/792952
- 657 He F, Arce AL, Schmitz G, Koornneef M, Novikova P, Beyer A, de Meaux J. 2016.  
658 The Footprint of Polygenic Adaptation on Stress-Responsive Cis-Regulatory  
659 Divergence in the *Arabidopsis* Genus. *Mol Biol Evol* **33**:2088–2101. doi:  
660 10.1093/molbev/msw096
- 661 Jain K, Stephan W. 2017a. Modes of Rapid Polygenic Adaptation. *Mol Biol Evol*

- 662           **34**:3169–3175. doi: 10.1093/molbev/msx240
- 663   Jain K, Stephan W. 2017b. Rapid Adaptation of a Polygenic Trait After a Sudden  
664           Environmental Shift. *Genetics* **206**:389–406. doi:  
665           10.1534/genetics.116.196972
- 666   Jain K, Stephan W. 2015. Response of Polygenic Traits Under Stabilizing Selection  
667           and Mutation When Loci Have Unequal Effects. *G3* **5**:1065–1074. doi:  
668           10.1534/g3.115.017970
- 669   Jiménez-Mena B, Tataru P, Brøndum RF, Sahana G, Guldbrandtsen B, Bataillon T.  
670           2016. One size fits all? Direct evidence for the heterogeneity of genetic drift  
671           throughout the genome. *Biol Lett* **12**. doi: 10.1098/rsbl.2016.0426
- 672   John S, Stephan W. 2020. Important role of genetic drift in rapid polygenic  
673           adaptation. *Ecol Evol* **10**:1278–1287. doi:10.1002/ece3.5981
- 674   Josephs EB, Berg JJ, Ross-Ibarra J, Coop G. 2019. Detecting Adaptive  
675           Differentiation in Structured Populations with Genomic Data and Common  
676           Gardens. *Genetics* **211**:989–1004. doi: 10.1534/genetics.118.301786
- 677   Keightley PD, Jackson BC. 2018. Inferring the Probability of the Derived vs. the  
678           Ancestral Allelic State at a Polymorphic Site. *Genetics* **209**:897–906.  
679           doi:10.1534/genetics.118.301120
- 680   Kelleher J, Etheridge AM, McVean G. 2016. Efficient Coalescent Simulation and  
681           Genealogical Analysis for Large Sample Sizes. *PLoS Comput Biol*  
682           **12**:e1004842. doi: 10.1371/journal.pcbi.1004842
- 683   Lande R. 1983. The response to selection on major and minor mutations affecting a  
684           metrical trait. *Heredity* **50**:47–65. doi: 10.1038/hdy.1983.6
- 685   Le Corre V, Kremer A. 2012. The genetic differentiation at quantitative trait loci under  
686           local adaptation. *Mol Ecol* **21**:1548–1566. doi: 10.1111/j.1365-

- 687           294X.2012.05479.x
- 688   Lemay DG, Lynn DJ, Martin WF, Neville MC, Casey TM, Rincon G, Kriventseva EV,  
689           Barris WC, Hinrichs AS, Molenaar AJ, Pollard KS, Maqbool NJ, Singh K,  
690           Murney R, Zdobnov EM, Tellam RL, Medrano JF, German JB, Rijnkels M.  
691           2009. The bovine lactation genome: insights into the evolution of mammalian  
692           milk. *Genome Biol* **10**:R43. doi: 10.1186/gb-2009-10-4-r43
- 693   Li H, Durbin R. 2009. Fast and accurate short read alignment with Burrows–Wheeler  
694           transform. *Bioinformatics* **25**:1754–1760. doi: 10.1093/bioinformatics/btp324
- 695   Li H, Handsaker B, Wysoker A, Fennell T, Ruan J, Homer N, Marth G, Abecasis G,  
696           Durbin R, 1000 Genome Project Data Processing Subgroup. 2009. The  
697           Sequence Alignment/Map format and SAMtools. *Bioinformatics* **25**:2078–  
698           2079. doi: 10.1093/bioinformatics/btp352
- 699   Liu X, Li YI, Pritchard JK. 2019. Trans Effects on Gene Expression Can Drive  
700           Omnigenic Inheritance. *Cell* **177**:1022–1034.e6. doi:  
701           10.1016/j.cell.2019.04.014
- 702   MacEachern S, Hayes B, McEwan J, Goddard M. 2009. An examination of positive  
703           selection and changing effective population size in Angus and Holstein cattle  
704           populations (*Bos taurus*) using a high density SNP genotyping platform and  
705           the contribution of ancient polymorphism to genomic diversity in Domestic  
706           cattle. *BMC Genomics* **10**:181. doi: 10.1186/1471-2164-10-181
- 707   McKenna A, Hanna M, Banks E, Sivachenko A, Cibulskis K, Kernytsky A, Garimella  
708           K, Altshuler D, Gabriel S, Daly M, DePristo MA. 2010. The Genome Analysis  
709           Toolkit: A MapReduce framework for analyzing next-generation DNA  
710           sequencing data. *Genome Res* **20**:1297–1303. doi: 10.1101/gr.107524.110
- 711   Meuwissen T, Hayes B, Goddard M. 2013. Accelerating Improvement of Livestock

- 712 with Genomic Selection. *Annu Rev Anim Biosci* **1**:221–237. doi:  
713 10.1146/annurev-animal-031412-103705
- 714 Nelsen TC, Short RE, Urick JJ, Reynolds WL. 1986. Heritabilities and Genetic  
715 Correlations of Growth and Reproductive Measurements in Hereford Bulls. *J*  
716 *Anim Sci* **63**:409–417. doi: 10.2527/jas1986.632409x
- 717 Nielsen R. 2005. Molecular Signals of Natural Selection. *Annu Rev Genet* **39**:197–  
718 218. doi: 10.1146/annurev.genet.39.073003.112420
- 719 Nordborg M, Donnelly P. 1997. The Coalescent Process With Selfing. *Genetics*  
720 **146**:1185–1195.
- 721 Northcutt SL, Wilson DE. 1993. Genetic parameter estimates and expected progeny  
722 differences for mature size in Angus cattle. *J Anim Sci* **71**:1148–1153. doi:  
723 10.2527/1993.7151148x
- 724 Novembre J, Barton NH. 2018. Tread Lightly Interpreting Polygenic Tests of  
725 Selection. *Genetics* **208**:1351–1355. doi: 10.1534/genetics.118.300786
- 726 Pavlidis P, Metzler D, Stephan W. 2012. Selective Sweeps in Multilocus Models of  
727 Quantitative Traits. *Genetics* **192**:225–239. doi: 10.1534/genetics.112.142547
- 728 Pritchard JK, Di Rienzo A. 2010. Adaptation - not by sweeps alone. *Nat Rev Genet*  
729 **11**:665–667. doi: 10.1038/nrg2880
- 730 Pritchard JK, Pickrell JK, Coop G. 2010. The Genetics of Human Adaptation: Hard  
731 Sweeps, Soft Sweeps, and Polygenic Adaptation. *Curr Biol* **20**:R208–R215.  
732 doi: 10.1016/j.cub.2009.11.055
- 733 Qanbari S, Pausch H, Jansen S, Somel M, Strom TM, Fries R, Nielsen R, Simianer  
734 H. 2014. Classic Selective Sweeps Revealed by Massive Sequencing in  
735 Cattle. *PLoS Genet* **10**:e1004148. doi: 10.1371/journal.pgen.1004148
- 736 Qanbari S, Pimentel ECG, Tetens J, Thaller G, Lichtner P, Sharifi AR, Simianer H.

- 737           2010. A genome-wide scan for signatures of recent selection in Holstein cattle.  
738           *Anim Genet*. doi: 10.1111/j.1365-2052.2009.02016.x
- 739   Quinlan AR, Hall IM. 2010. BEDTools: a flexible suite of utilities for comparing  
740           genomic features. *Bioinformatics* **26**:841–842. doi:  
741           10.1093/bioinformatics/btq033
- 742   R Core Team. 2019. R: A Language and Environment for Statistical Computing.  
743           Vienna, Austria: R Foundation for Statistical Computing. [http://www.R-](http://www.R-project.org)  
744           project.org
- 745   Racimo F, Berg JJ, Pickrell JK. 2018. Detecting Polygenic Adaptation in Admixture  
746           Graphs. *Genetics* **208**:1565–1584. doi: 10.1534/genetics.117.300489
- 747   Reinhardt TA, Lippolis JD. 2006. Bovine Milk Fat Globule Membrane Proteome. *J*  
748           *Dairy Res* **73**:406–416. doi: 10.1017/S0022029906001889
- 749   Robinson MR, Hemani G, Medina-Gomez C, Mezzavilla M, Esko T, Shakhbazov K,  
750           Powell JE, Vinkhuyzen A, Berndt SI, Gustafsson S, Justice AE, Kahali B,  
751           Locke AE, Pers TH, Vedantam S, Wood AR, van Rheenen W, Andreassen OA,  
752           Gasparini P, Metspalu A, Berg LH van den, Veldink JH, Rivadeneira F, Werge  
753           TM, Abecasis GR, Boomsma DI, Chasman DI, de Geus EJC, Frayling TM,  
754           Hirschhorn JN, Hottenga JJ, Ingelsson E, Loos RJF, Magnusson PKE, Martin  
755           NG, Montgomery GW, North KE, Pedersen NL, Spector TD, Speliotes EK,  
756           Goddard ME, Yang J, Visscher PM. 2015. Population genetic differentiation of  
757           height and body mass index across Europe. *Nat Genet* **47**: 1357-1362. doi:  
758           10.1038/ng.3401
- 759   Rosen B, Bickhart DM, Schnabel RD, Koren S, Elsik C, Zimin AV, Dreischer C,  
760           Schultheiss S, Hall R, Schroeder S, Van Tassell CP, Smith T, Medrano JF.  
761           2018. Modernizing the Bovine Reference Genome Assembly. *Proc World*



- 762           *Congr Genet Appl Livest Prod* 11–16.
- 763 Sanjak JS, Sidorenko J, Robinson MR, Thornton KR, Visscher PM. 2018. Evidence  
764           of directional and stabilizing selection in contemporary humans. *Proc Natl*  
765           *Acad Sci USA* **115**:151–156. doi: 10.1073/pnas.1707227114
- 766 Savolainen O, Lascoux M, Merila J. 2013. Ecological genomics of local adaptation.  
767           *Nat Rev Genet* **14**:807–820. doi: 10.1038/nrg3522
- 768 Schoech AP, Jordan DM, Loh P-R, Gazal S, O'Connor LJ, Balick DJ, Palamara PF,  
769           Finucane HK, Sunyaev SR, Price AL. 2019. Quantification of frequency-  
770           dependent genetic architectures in 25 UK Biobank traits reveals action of  
771           negative selection. *Nat Commun* **10**:790. doi: 10.1038/s41467-019-08424-6
- 772 Sella G, Barton NH. 2019. Thinking About the Evolution of Complex Traits in the Era  
773           of Genome-Wide Association Studies. *Annu Rev Genomics Hum Genet*  
774           **20**:461–493. doi: 10.1146/annurev-genom-083115-022316
- 775 Smolenski G, Haines S, Kwan FY-S, Bond J, Farr V, Davis SR, Stelwagen K,  
776           Wheeler TT. 2007. Characterisation of Host Defence Proteins in Milk Using a  
777           Proteomic Approach. *J Proteome Res* **6**:207–215. doi: 10.1021/pr0603405
- 778 Sohail M, Maier RM, Ganna A, Bloemendal A, Martin AR, Turchin MC, Chiang CW,  
779           Hirschhorn J, Daly MJ, Patterson N, Neale B, Mathieson I, Reich D, Sunyaev  
780           SR. 2019. Polygenic adaptation on height is overestimated due to uncorrected  
781           stratification in genome-wide association studies. *eLife* **8**:e39702. doi:  
782           10.1126/science.aah5238
- 783 Sørensen AC, Sørensen MK, Berg P. 2005. Inbreeding in Danish Dairy Cattle  
784           Breeds. *J Dairy Sci* **88**:1865–1872. doi: 10.3168/jds.S0022-0302(05)72861-7
- 785 Speidel L, Forest M, Shi S, Myers SR. 2019. A method for genome-wide genealogy  
786           estimation for thousands of samples. *Nat Genet* **51**:1321–1329. doi:

- 787           10.1038/s41588-019-0484-x
- 788   Stephan W. 2019. Selective Sweeps. *Genetics* **211**:5–13. doi:
- 789           10.1534/genetics.118.301319
- 790   Stephan W. 2016. Signatures of positive selection: from selective sweeps at
- 791           individual loci to subtle allele frequency changes in polygenic adaptation. *Mol*
- 792           *Ecol* **25**:79–88. doi: 10.1111/mec.13288
- 793   Stetter MG, Thornton K, Ross-Ibarra J. 2018. Genetic architecture and selective
- 794           sweeps after polygenic adaptation to distant trait optima. *PLoS Genet*
- 795           **14**:e1007794. doi: 10.1371/journal.pgen.1007794
- 796   Storey JD, Bass AJ, Dabney A, Robinson D. 2019. qvalue: Q-value estimation for
- 797           false discovery rate control. <http://github.com/StoreyLab/qvalue>
- 798   Svardal H, Jasinska AJ, Apetrei C, Coppola G, Huang Y, Schmitt CA, Jacquelin B,
- 799           Ramensky V, Müller-Trutwin M, Antonio M, Weinstock G, Grobler JP, Dewar K,
- 800           Wilson RK, Turner TR, Warren WC, Freimer NB, Nordborg M. 2017. Ancient
- 801           hybridization and strong adaptation to viruses across African vervet monkey
- 802           populations. *Nat Genet* **49**:1705–1713. doi: 10.1038/ng.3980
- 803   Thornton KR. 2019. Polygenic Adaptation to an Environmental Shift: Temporal
- 804           Dynamics of Variation Under Gaussian Stabilizing Selection and Additive
- 805           Effects on a Single Trait. *Genetics* **213**:1513–1530. doi:
- 806           10.1534/genetics.119.302662
- 807   Turchin MC, Chiang CW, Palmer CD, Sankararaman S, Reich D, Genetic
- 808           Investigation of ANthropometric Traits (GIANT) Consortium, Hirschhorn JN.
- 809           2012. Evidence of widespread selection on standing variation in Europe at
- 810           height-associated SNPs. *Nat Genet* **44**:1015. doi: 10.1038/ng.2368
- 811   Uricchio LH, Kitano HC, Gusev A, Zaitlen NA. 2019. An evolutionary compass for

- 812 detecting signals of polygenic selection and mutational bias. *Evol Lett* **3**:69–  
813 79. doi: 10.1002/evl3.97
- 814 Visscher PM, Goddard ME. 2019. From R.A. Fisher's 1918 Paper to GWAS a  
815 Century Later. *Genetics* **211**:1125–1130. doi: 10.1534/genetics.118.301594
- 816 Vitti JJ, Grossman SR, Sabeti PC. 2013. Detecting Natural Selection in Genomic  
817 Data. *Annu Rev Genet* **47**:97–120. doi: 10.1146/annurev-genet-111212-  
818 133526
- 819 Whitlock MC. 2008. Evolutionary inference from  $Q_{ST}$ . *Mol Ecol* **17**:1885–1896. doi:  
820 10.1111/j.1365-294X.2008.03712.x
- 821 Wieters B, Steige KA, He F, Koch EM, Ramos-Onsins SE, Gu H, Guo Y-L, Sunyaev  
822 S, de Meaux J. 2020. Polygenic adaptation of rosette growth variation in  
823 *Arabidopsis thaliana* populations. *bioRxiv* 2020.03.31.018341. doi:  
824 10.1101/2020.03.31.018341
- 825 Wollstein A, Stephan W. 2014. Adaptive Fixation in Two-Locus Models of Stabilizing  
826 Selection and Genetic Drift. *Genetics* **198**:685–697. doi:  
827 10.1534/genetics.114.168567
- 828 Wray NR, Kemper KE, Hayes BJ, Goddard ME, Visscher PM. 2019. Complex Trait  
829 Prediction from Genome Data: Contrasting EBV in Livestock to PRS in  
830 Humans. *Genetics* **211**:1131–1141. doi: 10.1534/genetics.119.301859
- 831 Wray NR, Wijmenga C, Sullivan PF, Yang J, Visscher PM. 2018. Common Disease Is  
832 More Complex Than Implied by the Core Gene Omnigenic Model. *Cell*  
833 **173**:1573–1580. doi: 10.1016/j.cell.2018.05.051
- 834 Wright S. 1951. The genetical structure of populations. *Ann Eugen* **15**:323–354.
- 835 Yang J, Bakshi A, Zhu Z, Hemani G, Vinkhuyzen AAE, Lee SH, Robinson MR, Perry  
836 JRB, Nolte IM, van Vliet-Ostaptchouk JV, Snieder H, Study TLC, Esko T,

- 837 Milani L, Magi R, Metspalu A, Hamsten A, Magnusson PKE, Pedersen NL,  
838 Ingelsson E, Soranzo N, Keller MC, Wray NR, Goddard ME, Visscher PM.  
839 2015. Genetic variance estimation with imputed variants finds negligible  
840 missing heritability for human height and body mass index. *Nat Genet.* **47**:  
841 1114-1120. doi: 10.1038/ng.3390
- 842 Yeaman S, Hodgins KA, Lotterhos KE, Suren H, Nadeau S, Degner JC, Nurkowski  
843 KA, Smets P, Wang T, Gray LK, Liepe KJ, Hamann A, Holliday JA, Whitlock  
844 MC, Rieseberg LH, Aitken SN. 2016. Convergent local adaptation to climate in  
845 distantly related conifers. *Science* **353**:1431-1433. doi:  
846 10.1126/science.aaf7812
- 847 Zan Y, Carlborg Ö. 2018. A Polygenic Genetic Architecture of Flowering Time in the  
848 Worldwide *Arabidopsis thaliana* Population. *Mol Biol Evol* **36**:141–154. doi:  
849 10.1093/molbev/msy203
- 850 Zeder MA. 2008. Domestication and early agriculture in the Mediterranean Basin:  
851 Origins, diffusion, and impact. *Proc Natl Acad Sci USA* **105**:11597–11604. doi:  
852 10.1073/pnas.0801317105
- 853 Zeng J, de Vlaming R, Wu Y, Robinson MR, Lloyd-Jones LR, Yengo L, Yap CX, Xue  
854 A, Sidorenko J, McRae AF, Powell JE, Montgomery GW, Metspalu A, Esko T,  
855 Gibson G, Wray NR, Visscher PM, Yang J. 2018. Signatures of negative  
856 selection in the genetic architecture of human complex traits. *Nat Genet*  
857 **50**:746–753. doi: 10.1038/s41588-018-0101-4
- 858 Zhao F, McParland S, Kearney F, Du L, Berry DP. 2015. Detection of selection  
859 signatures in dairy and beef cattle using high-density genomic information.  
860 *Genet Sel Evol* **47**:49. doi: 10.1186/s12711-015-0127-3
- 861 Zhou X, Carbonetto P, Stephens M. 2013. Polygenic Modeling with Bayesian Sparse

862            Linear Mixed Models. *PLoS Genet* **9**:e1003264. doi:

863            10.1371/journal.pgen.1003264

864

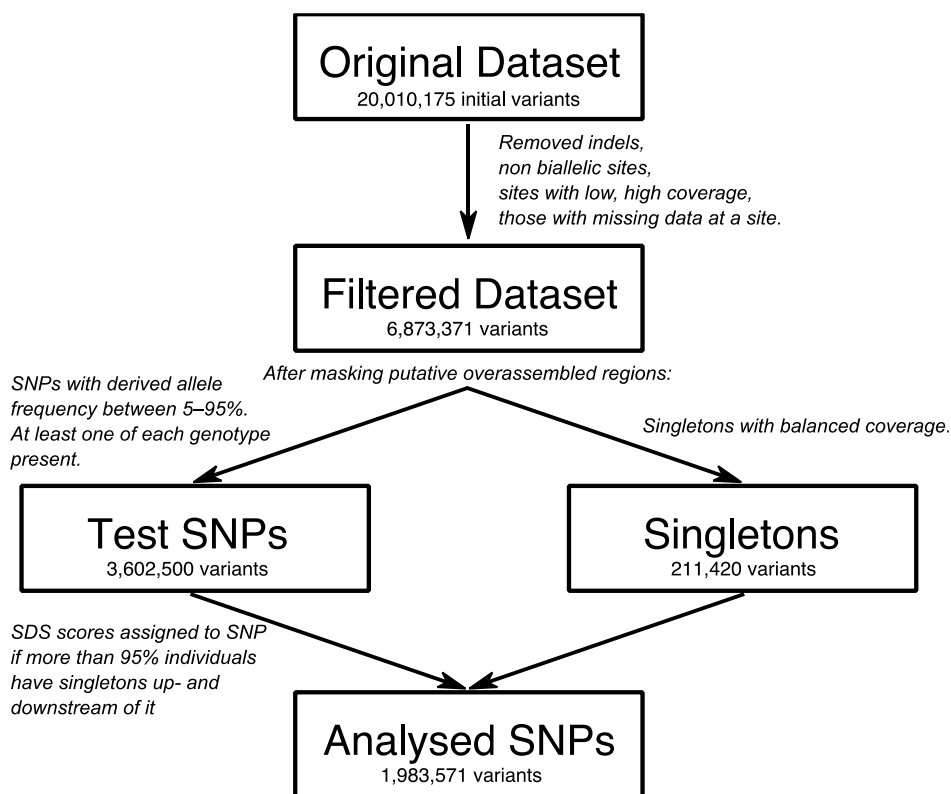

865

866

Figure 1: Schematic of data filtering.

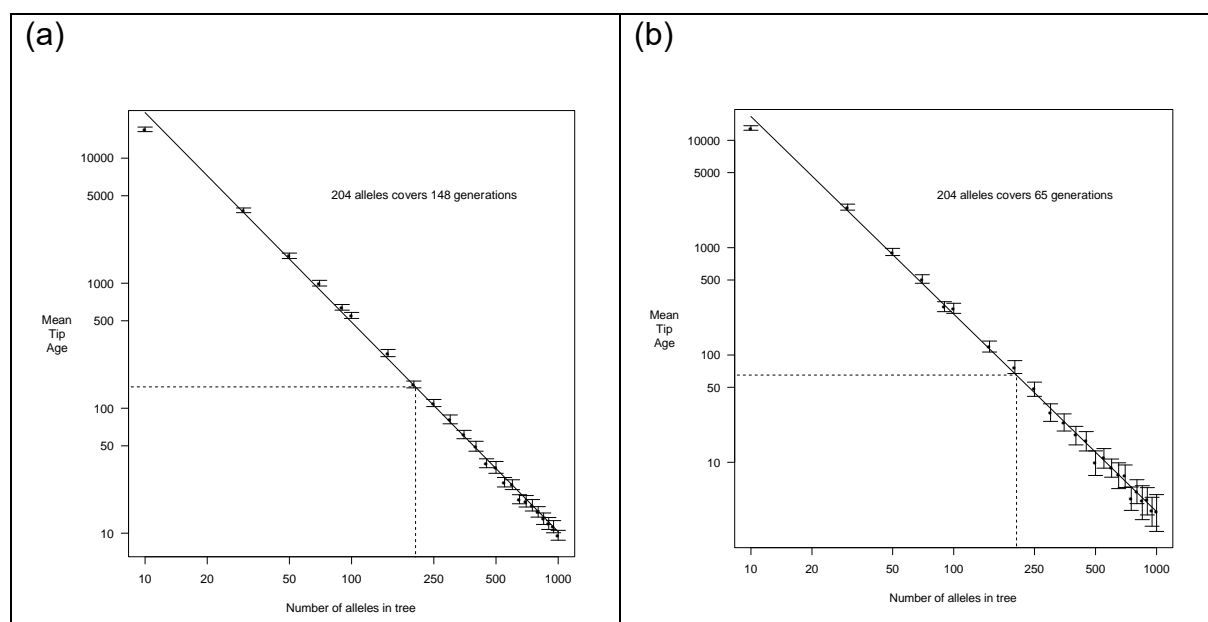

867 Figure 2: Simulated mean tip age for *B. taurus*, as a function of the number of allele  
868 samples. Simulations assumed either (a) demography as inferred by Boitard et al.  
869 (2016b) (the 'High  $N_0$ ' model), or (b) the same but with a smaller present-day  $N_e$  of  
870 49 (the 'Low  $N_0$ ' model). Points are the mean values; bars show 95% confidence  
871 intervals. The solid line is the best linear fit to the log of both values; dotted lines  
872 show the predicted tip age for 204 alleles.

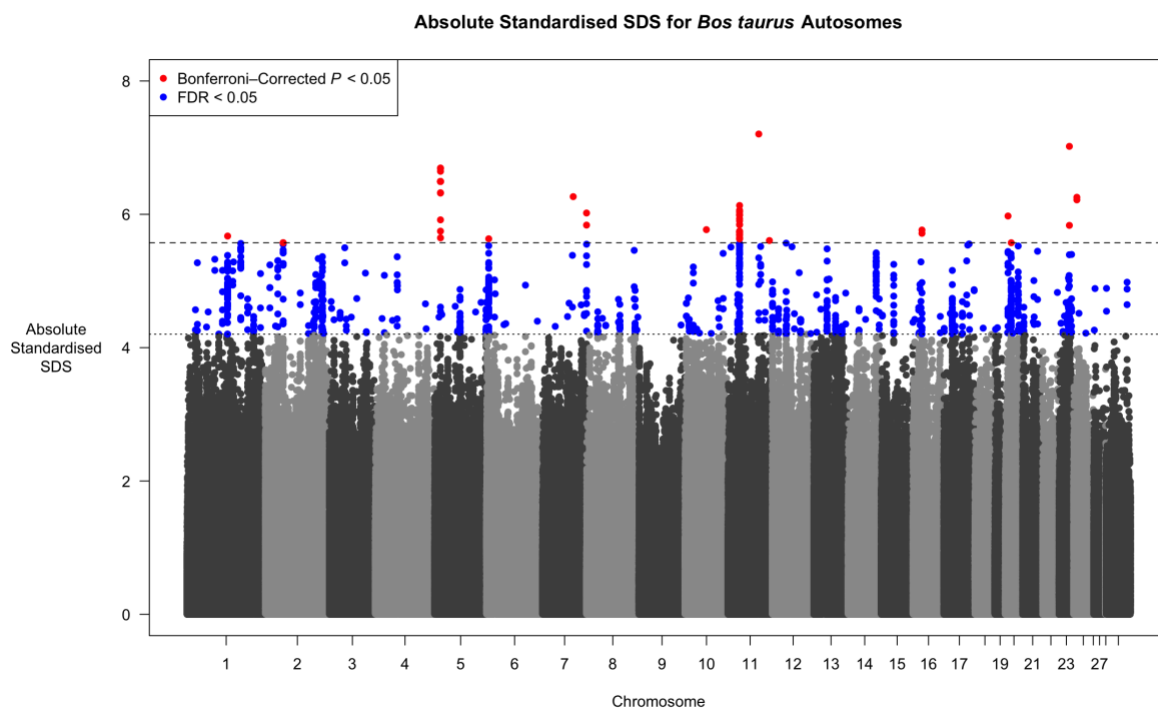

873  
874

875 Figure 3: asSDS scores across *B. taurus* autosomes, as a function of the  
876 chromosome. Alternating black and grey points show (non-significant) values from  
877 different chromosomes. Blue points are SNPs with  $FDR < 0.05$ , with the cutoff  
878 denoted by a horizontal dotted line. Red points are SNPs with Bonferroni-corrected  
879  $P$ -value  $< 0.05$  (actual  $P$ -value  $< \sim 2.5e-8$ ), with the cutoff denoted by a horizontal  
880 dashed line. Figure S1 shows results for the Low  $N_0$  model.



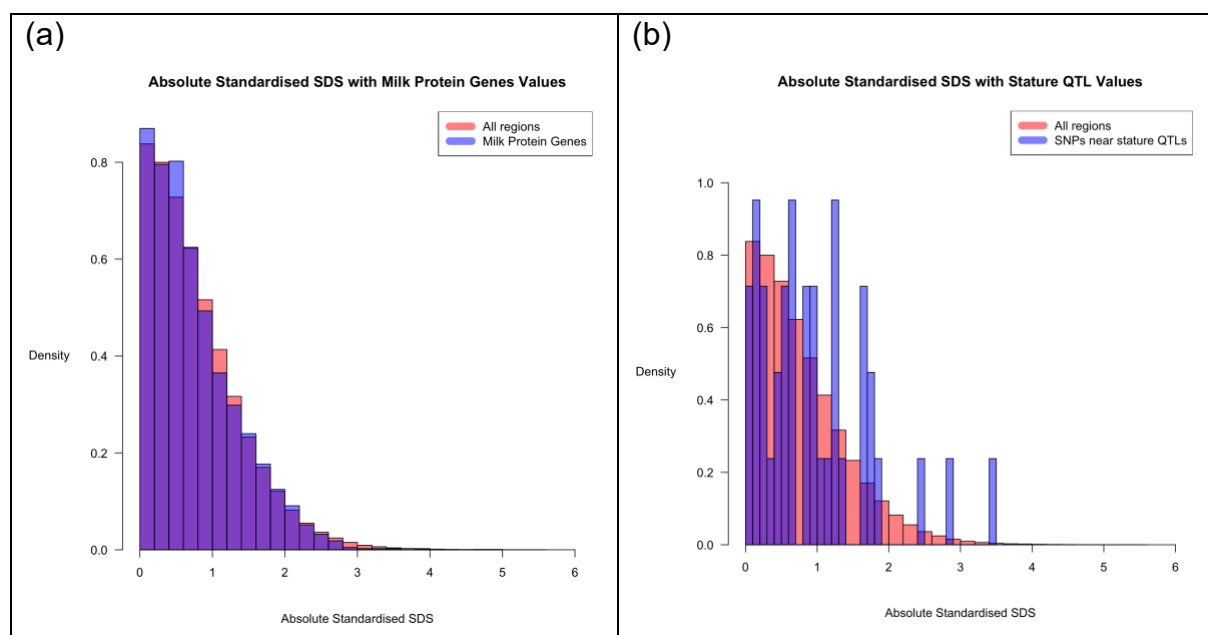

881 Figure 4: Histograms of asSDS, showing the background distribution over all SNPs  
882 (red), compared to (a) asSDS in milk-protein genes, or (b) asSDS of the nearest  
883 SNPs to stature QTLs. In (b) QTLs were obtained if effect sizes were reported in at  
884 least 6 of 7 Holstein populations (as measured in Bouwman et al. (2018)). Figure S2  
885 shows the distribution if using QTLs obtained with effect sizes reported in at least 5 of  
886 7 Holstein populations; Figure S3 shows results for the low  $N_0$  model.

| Chromosome | Gene Name  | Start Position | End Position | Gene Biotype   | High, Low $N_0$ |
|------------|------------|----------------|--------------|----------------|-----------------|
| 1          | PPM1L      | 106405113      | 106727070    | Protein Coding | Low             |
| 2          | U6         | 38379710       | 38379816     | SnRNA          | Low             |
| 2          | ICA1L      | 91143446       | 91177884     | Protein Coding | Low             |
| 2          | ADAM23     | 94711218       | 94906499     | Protein Coding | Low             |
| 2          | PTH2R      | 96667717       | 96752328     | Protein Coding | Low             |
| 5          | TMCC3      | 24306913       | 24595494     | Protein Coding | High, Low       |
| 5          | CEP83      | 24070404       | 24345243     | Protein Coding | High, Low       |
| 6          | MANBA      | 22062326       | 22189956     | Protein Coding | High            |
| 7          | (Unnamed)  | 87293323       | 87297625     | Protein Coding | Low             |
| 8          | ROR2       | 85905346       | 86141520     | Protein Coding | Low             |
| 8          | (Unnamed)  | 85959505       | 86086599     | Protein Coding | Low             |
| 10         | TRIM9      | 43826973       | 43944784     | Protein Coding | High            |
| 11         | NRXN1      | 32278324       | 32766620     | Protein Coding | High, Low       |
| 14         | GRHL2      | 62721044       | 62888891     | Protein Coding | Low             |
| 17         | GALNT9     | 44853887       | 44968139     | Protein Coding | Low             |
| 17         | RIMBP2     | 46406767       | 46715519     | Protein Coding | Low             |
| 20         | GHR        | 31868624       | 32178311     | Protein Coding | Low             |
| 20         | FBXO4      | 32589453       | 32602498     | Protein Coding | Low             |
| 20         | C20H5orf51 | 32612381       | 32634378     | Protein Coding | Low             |
| 23         | (Unnamed)  | 29291787       | 29292713     | Protein Coding | High, Low       |
| 23         | OR12D2     | 29305933       | 29309785     | Protein Coding | High, Low       |
| 24         | GAREM1     | 24694637       | 24927333     | Protein Coding | High, Low       |

887

888 Table 1: Genes that overlap or lie close to Bonferroni–significant asSDS regions. The

889 ‘High, Low  $N_0$ ’ column specifies which genes are close to significant SNPs for each

890

$N_0$  model.
