# 1 Using singleton densities to detect recent 2 selection in *Bos taurus*

3 *Matthew Hartfield*<sup>1,2</sup>, *Nina Aagaard Poulsen*<sup>3</sup>, *Bernt Guldbrandtser*<sup>4,5,6</sup>, *Thomas*  
4 *Bataillon*<sup>1</sup>

5 1) Bioinformatics Research Centre, Aarhus University, DK–8000 Aarhus, Denmark.

6 2) Institute of Evolutionary Biology, University of Edinburgh, Edinburgh EH9 3FL, UK.

7 3) Department of Food Science, Aarhus University, Agro Food Park 48, 8200 Aarhus  
8 N, Denmark.

9 4) Center for Quantitative Genetics and Genomics, Department of Molecular Biology  
10 and Genetics, Aarhus University, DK–8830 Tjele, Denmark.

11 5) Rheinische Friedrich-Wilhelms-Universität Bonn, Institut für Tierwissenschaften,  
12 Tierzucht, Endenicher Allee 15, D-53115 Bonn, Germany.

13 6) Department of Veterinary Sciences, Copenhagen University, DK–1870  
14 Frederiksberg C, Denmark.

15

16 *Corresponding author:* Matthew Hartfield (m.hartfield@ed.ac.uk).

17

18 **Key words:** selection, genomics, *Bos taurus*, milk protein, milk fat, stature.

19 **Abstract: Many quantitative traits are subject to polygenic selection, where**  
20 **several genomic regions undergo small, simultaneous changes in allele**  
21 **frequency that collectively alter a phenotype. The widespread availability of**  
22 **genome data, along with novel statistical techniques, has made it easier to**  
23 **detect these changes. We apply one such method, the ‘Singleton Density Score’,**  
24 **to the Holstein breed of *Bos taurus* to detect recent selection (arising up to**  
25 **around 740 years ago). We identify several genes as candidates for targets of**  
26 **recent selection, including some relating to cell regulation, catabolic processes,**  
27 **neural-cell adhesion and immunity. We do not find strong evidence that three**  
28 **traits that are important to humans – milk protein content, milk fat content, and**  
29 **stature – have been subject to directional selection. Simulations demonstrate**  
30 **that since *B. taurus* recently experienced a population bottleneck, singletons are**  
31 **depleted so the power of SDS methods are reduced. These results inform on**  
32 **which genes underlie recent genetic change in *B. taurus*, while providing**  
33 **information on how polygenic selection can be best investigated in future**  
34 **studies.**

35

36 **Impact statement:** Many traits of ecological or economic importance (including height,  
37 disease propensity, climatic adaptation) are ‘polygenic’. That is, they are affected by a  
38 large number of genetic variants, with each one only making a small contribution to a  
39 trait, but collectively influence variation. As selection acts on all of these variants  
40 simultaneously, it only changes the frequency of each one by a small amount, making  
41 it hard to detect such selection from genome data. This situation has changed in recent  
42 years, with the proliferation of whole–genome data from many individuals, along with  
43 the development of methods to detect the subtle effects of polygenic selection. Here,  
44 we use data from 102 genomes from domesticated cattle (*Bos taurus*) that has  
45 experienced intense artificial selection since domestication, and test whether we can  
46 detect signatures of recent selection (arising up to 740 years ago). Domesticated  
47 species are appealing for this kind of study, as they are subject to extensive genome  
48 sequencing studies, and genetic variants can be related to traits under selection. We  
49 carried out our analysis in two parts. We first performed a genome–wide scan to find  
50 individual genetic regions that show signatures of recent selection. We identify some  
51 relating to cell regulation, catabolic processes, neural-cell adhesion and immunity. In  
52 the second part, we then analysed genetic regions associated with three key traits:  
53 milk protein content, milk fat content, and stature. We tested whether these regions  
54 collectively showed a signature of selection, but did not find a significant result in either  
55 case. Simulations suggest that the domestication history of cattle affected the power  
56 of these methods. We end with a discussion on how to best detect polygenic selection  
57 in future studies.

## 58 ***Introduction***

59           Determining which genomic regions have been subject to selection is a major  
60 research goal in evolutionary genetics. Traditional methods have focused on  
61 detecting strong selection affecting individual genes (Nielsen, 2005; Vitti *et al.*, 2013;  
62 Stephan, 2019). An alternative process is ‘polygenic selection’, where many loci  
63 contribute to genetic variation in a trait, so selection acting on it is expected to  
64 generate small and simultaneous allele frequency changes at multiple loci (Pritchard  
65 & Di Rienzo, 2010; Pritchard *et al.*, 2010). Many polygenic models have been  
66 formulated to account for both the response to phenotypic selection, and the  
67 maintenance of genetic variance in quantitative traits [reviewed by Sella & Barton  
68 (2019); Barghi *et al.* (2020)]. Among them is Fisher’s infinitesimal model, which is  
69 important for its historical role in uniting population and quantitative genetics, and its  
70 recent renaissance in the context of genome-wide association studies (Fisher, 1918;  
71 Barton & Keightley, 2002; Barton *et al.*, 2017; Charlesworth & Edwards, 2018;  
72 Visscher & Goddard, 2019). However, whereas it has been possible to identify which  
73 genetic regions contribute to trait variation, it has historically been hard to infer which  
74 alleles have been involved in the polygenic selection response. Extensive theoretical  
75 studies of how alleles at multiple loci act when a population adapts to a new optimum  
76 generally find that ‘large-effect’ alleles, which strongly affect a trait, are the first to  
77 spread and fix while ‘small-effect’ alleles take much longer to reach high frequencies  
78 (de Vladar & Barton, 2014; Wollstein & Stephan, 2014; Jain & Stephan, 2015, 2017a,  
79 2017b; Stetter *et al.*, 2018; Thornton, 2019; Hayward & Sella, 2019). Furthermore, if  
80 epistasis exists between variants, many selected alleles do not reach fixation as they  
81 eventually become deleterious (de Vladar & Barton, 2014; Jain & Stephan, 2017b).

82 The spread of large-effect alleles may also be impeded if a faster adaptive response  
83 can be otherwise realised through changes at many small-effect alleles (Lande,  
84 1983; Chevin & Hospital, 2008; Pavlidis *et al.*, 2012; Chevin, 2019). Alternatively, if  
85 the optimum shift is sufficiently big, then large-effect mutations that first go to fixation  
86 can subsequently be replaced by small-effect variants over longer timescales (on the  
87 order of the population size; Hayward and Sella (2019)). Overall, only a small  
88 proportion of loci affected by polygenic selection are expected to fix sufficiently  
89 quickly to leave selection signatures in genomic data (Pavlidis *et al.*, 2012; Thornton,  
90 2019).

91 Due to this difficulty, earlier methods for detecting polygenic selection focused  
92 on cases where selection favours distinct phenotypes in different populations, so trait  
93 differentiation amongst populations will be greater than expected under neutral drift.  
94 Tests for this form of selection relied on comparing  $Q_{st}$  and  $F_{st}$  statistics, which  
95 respectively measured mean genetic differentiation at the trait itself and a set of  
96 neutral loci (Whitlock, 2008; Le Corre & Kremer, 2012; Savolainen *et al.*, 2013). Yet  
97 these methods do not determine which genomic regions are subject to selection. This  
98 situation has now changed with the increased number of genome-wide association  
99 study (GWAS) data that link genotypes and phenotypes, as exemplified by the  
100 development of large cohort studies [e.g., the UK Biobank; Bycroft *et al.* (2018)]. The  
101 release of these data spurred a series of studies and new methods designed  
102 specifically to detect polygenic selection. These methods usually involve determining,  
103 which SNPs affecting a phenotype show correlated changes in frequency (Berg &  
104 Coop, 2014; Racimo *et al.*, 2018; Sanjak *et al.*, 2018; Josephs *et al.*, 2019; Berg *et*  
105 *al.*, 2019a, 2019b; Uricchio *et al.*, 2019; Edge & Coop, 2019; Kreiner *et al.*, 2020;

106 Wieters *et al.*, 2021; Gramlich *et al.*, 2021); which sets of alleles are associated with  
107 certain environmental or climatic variations (Coop *et al.*, 2010; Turchin *et al.*, 2012;  
108 Robinson *et al.*, 2015; Yeaman *et al.*, 2016; Exposito-Alonso *et al.*, 2018; Zan &  
109 Carlborg, 2018; Exposito-Alonso *et al.*, 2019; MacLachlan *et al.*, 2021; Ehrlich *et al.*,  
110 2021; Fuhrmann *et al.*, 2021; Rowan *et al.*, 2021); or determining which SNPs or  
111 genetic regions explain a large fraction of phenotypic variance and trait heritability  
112 (Zhou *et al.*, 2013; Yang *et al.*, 2015; Gazal *et al.*, 2017; Zeng *et al.*, 2018; Schoech  
113 *et al.*, 2019; Exposito-Alonso *et al.*, 2020; Duntsch *et al.*, 2020; Zeng *et al.*, 2021).  
114 Some of these approaches use overlapping methods.

115         Detecting recent polygenic selection is much harder, as long periods of time  
116 (number of generations on the order of the population size; Hayward and Sella, 2019;  
117 Thornton, 2019) may be needed to cause detectable frequency changes in alleles  
118 with small effect sizes. Over shorter timescales, these frequency changes are  
119 expected to be more modest and harder to detect (Stephan, 2016; Jain & Stephan,  
120 2017a). A recent breakthrough in detecting these subtle changes was the  
121 development of the ‘Singleton Density Score’ (SDS), a statistic tailored to detect  
122 recent and coordinated allele frequency changes over many SNPs (Field *et al.*,  
123 2016). Recent selection at a locus favouring one variant will lead to a reduction in the  
124 number of singletons (i.e., variants that are only observed once) around it. The SDS  
125 detects regions that exhibit a reduction in the density of singletons, to determine  
126 candidate regions that have been subject to recent selection. Using this approach,  
127 Field *et al.* (2016) found correlations between SDS scores at SNPs and their  
128 associated GWAS effect sizes for several polygenic traits in the modern UK human  
129 population, including increased height, infant head circumference and fasting insulin.

130 Their findings suggested that these traits have been subject to recent selection  
131 during the most recent 75 or so generations (about 2,000 years). However, these  
132 (and other) results that detect selection for increased height may instead reflect  
133 previously unaccounted–for population structure (Novembre and Barton, 2018;  
134 Barton et al., 2019; Sohail et al., 2019; Berg et al., 2019; Uricchio et al., 2019; Edge  
135 and Coop, 2019).

136 The SDS method is ideally suited to organisms where large amount of whole-  
137 genome data are available, along with QTL or GWAS information that link genotypes  
138 to phenotypes, Domesticated species are attractive systems for studying recent  
139 selection, as selected phenotypes are often already known and these species are  
140 subject to large–scale sequencing studies. Investigating the genetic architecture  
141 underlying rapid selection in these species is also important to determine how they  
142 respond to agricultural practices, and uncover selection targets that can be used to  
143 improve breeding programs (Georges *et al.*, 2018). Domestic cattle *Bos taurus* has  
144 been subject to intensive genomics analyses to improve artificial selection for traits  
145 that are important for human use, including milk protein yield, milk fat content, and  
146 stature (Hayes *et al.*, 2009; Meuwissen *et al.*, 2013; Wray *et al.*, 2019). These traits  
147 are influenced in part by an individual’s genome, with significant heritability estimates  
148 being recorded, some as high as 80% (Soyeurt *et al.*, 2007; Haile-Mariam *et al.*,  
149 2013; Buitenhuis *et al.*, 2016). Previous selection scans on *B. taurus* reported  
150 individual regions that were likely to be subject to recent selection, some of which  
151 were close to genetic regions for stature and milk protein content (Lemay *et al.*, 2009;  
152 MacEachern *et al.*, 2009; Qanbari *et al.*, 2010; Boitard & Rocha, 2013; Qanbari *et al.*,  
153 2014; Zhao *et al.*, 2015; Boitard *et al.*, 2016a; Bouwman *et al.*, 2018). However,

154 stature and milk protein content are polygenic traits, with several genetic regions and  
155 QTLs associated with each (Lemay *et al.*, 2009; Boitard *et al.*, 2016a; Bouwman *et*  
156 *al.*, 2018; van den Berg *et al.*, 2020). While recent methods have been developed to  
157 detect polygenic environmental adaptation (Rowan *et al.*, 2021), there has yet to be a  
158 formal test of whether these intrinsic traits show evidence of polygenic selection.

159 Here, we applied the SDS method to whole–autosome sequencing data from  
160 102 *B. taurus* Holstein individuals. We first determined genetic regions that have  
161 been subject to recent directional selection, and subsequently tested whether  
162 evidence exists for recent selection acting on a set of QTLs underlying either milk  
163 protein content, milk fat content, or stature in this breed.

164

## 165 ***Results***

### 166 *Methods outline*

167 We filtered the data to retain only bi–allelic SNPs that had a sensible level of  
168 coverage and did not lie in putatively over–assembled regions (i.e., duplicated  
169 sections that caused many reads to assemble at a specific genetic location). Over–  
170 assembled regions appear as highly heterozygous with elevated coverage, and can  
171 exhibit false signatures of recent selection. We also obtained a set of singletons and  
172 filtered them to retain high-quality variants where both alleles were equally well  
173 covered to remove potentially erroneous calls. We polarised test SNPs using  
174 outgroup sequences and applied the SDS test of Field *et al.* (2016) to detect recent  
175 selection, with increased SDS values reflecting selection favouring derived SNPs  
176 over ancestral variants. We standardised SDS scores with those of a similar  
177 frequency, so they are normally distributed [similar normalisation was also carried out



178 by Field et al. (2016)]. These values are denoted sSDS for ‘standardised SDS’.

179 Further details are available in the *Methods* in the Supplementary Text.

180

### 181 *Estimating timescale of selection*

182 We first determined the timescale over which we expect to detect selection in  
183 *B. taurus* using the SDS method. SDS measures the changes in singleton numbers  
184 around putatively selected SNPs, relative to background numbers in the absence of  
185 selection. As singletons arise on the tips of the underlying gene trees, the average tip  
186 length in the genealogy of sequenced samples determines the timescale over which  
187 the SDS detects a signal (Field et al., 2016). As more haploid genomes are included  
188 in the study, the time to first coalescence between two samples decreases, reducing  
189 the tip lengths and therefore shortening the timescale over which SDS detects  
190 selection (Field *et al.*, 2016). We hence simulate tip-ages over a range of sample  
191 sizes to investigate how this timescale changes accordingly.

192 To calculate the mean tip age, we simulated gene genealogies under two  
193 scenarios. We first simulated the Holstein population demography inferred by Boitard  
194 et al. (2016b), which suggested that this population experienced a sudden decline in  
195 effective population size ( $N_e$ ) since domestication, but with a present-day  $N_e$  (~793)  
196 that is much larger than that inferred from pedigree data [~49; Sørensen et al.  
197 (2005)] or from temporal variation in SNP frequencies (~48; Jiménez–Mena et al.  
198 2016). Hence, we also simulated genealogies under a second model that used the  
199 Boitard et al. (2016b) demographic model, but with the present-day  $N_e$  set to 49.  
200 These scenarios will be referred to as the ‘High  $N_0$ ’ and ‘Low  $N_0$ ’ models,  
201 respectively.

202 Figure 1 shows simulation results. Depending on the assumed present-day  
203  $N_e$ , the tip length in our sample of 204 alleles (i.e., assuming two per diploid  
204 individual) goes back either 65 or 148 generations. Assuming 5 years per generation  
205 (Boitard *et al.*, 2016b), this timescale corresponds to between 325 and 740 years  
206 ago. Since *B. taurus* domestication started around 10,000 years ago (Zeder, 2008)  
207 the sample size used in this study will only capture selection acting in the very recent  
208 past that is more relevant for breed formation, rather than selection during *B. taurus*  
209 domestication. Sample sizes and tip-ages are linearly related on a log-log scale,  
210 meaning that an increase in sample size will greatly decrease the timescale over  
211 which SDS detects selection. For example, with 500 haplotypes then SDS will detect  
212 selection acting no more than 50 generations ago, depending on the underlying  
213 demographic model.

214 We will focus on detecting selection signatures assuming the high  $N_0$  model.  
215 Results using the low  $N_0$  model to calibrate scores were broadly similar. They are  
216 outlined in the Supplementary Text; we will highlight when differences arise.

217

### 218 *Genome-wide sSDS*

219 Figure 2 plots sSDS values (at SNPs with minor allele frequency greater than  
220 5%) across all autosomes, excluding chromosome 25 (due to an insufficient number  
221 of singletons needed to obtain SDS scores after filtering). Many SNPs have elevated  
222 sSDS scores (158 SNPs at  $FDR < 0.05$ ; 306 for the low  $N_0$  model). Several regions  
223 contain SNPs with significantly high sSDS values (Bonferroni-corrected nominal  $P <$   
224  $0.05$ ; actual  $P < \sim 2.7 \times 10^{-8}$ ). To further investigate potential selection targets, we  
225 looked for genes that either overlapped significant SNPs or lay 10kb up- or

226 downstream of them. Linkage disequilibrium (LD), as measured by  $r^2$ , decays to  
227 around 0.2 over 50kb in Danish Holstein breeds (Buitenhuis *et al.*, 2016), so genes  
228 within 10kb should be in LD with regions harbouring high sSDS scores. Table 1 lists  
229 these genes, with more targets present under the low  $N_0$  model. Most of these genes  
230 are of unknown function (as listed on UniProt); the list also includes an snRNA.  
231 *PPM1L* is involved with cellular regulation and the activation of stress-activated  
232 protein kinases. *TDO2* is involved in tryptophan-related catabolic processes, while  
233 *NTM* is implicated in neural cell adhesion. SNPs with significantly elevated scores  
234 are also found on chromosome 23 near the MHC region, which may reflect over-  
235 dominant selection. All Bonferroni-significant SNPs were removed from subsequent  
236 tests of recent polygenic selection to prevent directional selection from skewing the  
237 underlying sSDS distributions. Figure S1 shows results for the low  $N_0$  model.

238

### 239 *Testing for polygenic selection acting on milk protein and stature*

240 If polygenic selection were acting on specific traits, we expect a positive  
241 correlation between the effect size of variant underpinning it, and selection acting on  
242 it as measured by sSDS. We collated sSDS scores of SNPs that lie close to QTLs  
243 reported for either milk fat percentage, milk protein percentage (van den Berg *et al.*,  
244 2020), or those that lie close to stature QTLs (Bouwman *et al.*, 2018). The latter were  
245 inferred from a meta-analysis of GWAS studies conducted in seven Holstein  
246 populations, but not every QTL had an effect size reported in each population. We  
247 hence investigated two overlapping consensus QTL sets, where an effect size was  
248 either reported in at least 6 of 7 populations (yielding 42 QTLs with sSDS scores  
249 associated with them), or where effect sizes were reported in at least 5 of 7

250 populations (58 QTLs had sSDS scores). We re-polarised SDS scores so that a  
251 positive score reflected a trait-increasing effect; we denote these values ‘tSDS’  
252 following Field *et al.* (2016). We then determine if there was a positive correlation  
253 between the absolute  $\log_{10}$ -value of the QTL  $P$ -value (a proxy for the effect size) and  
254 tSDS.

255 Figure 3 shows the relationship between QTL  $P$ -values and tSDS for SNPs  
256 that lie close to QTLs. Although positive trends are observed, they all exhibit non-  
257 significant correlations (milk fat percentage Spearman  $\rho = 0.0990$ ,  $P = 0.603$ ; milk  
258 protein percentage Spearman  $\rho = 0.0354$ ,  $P = 0.758$ ; stature from 6 breeds  
259 Spearman  $\rho = -0.0739$ ,  $P = 0.642$ ; stature from 5 breeds Spearman  $\rho = -0.00966$ ,  $P$   
260  $= 0.943$ ). Relationships remain non-significant after removing an outlier point for the  
261 milk traits whose QTL has an extremely low  $P$ -value (Figure S2), and also under the  
262 low  $N_0$  model (Figure S3; see figure legends for regression  $P$ -values).

263 sSDS (and tSDS) can become correlated along the genome if focal SNPs are  
264 in LD with one another, which was not accounted for in the preceding analyses. To  
265 determine whether LD could have affected these correlations, we randomly  
266 subsampled sSDS scores from SNPs that shared the same chromosome and bin of  
267 derived-allele frequency as the SNPs used in the above analyses, and re-polarised  
268 them to transform them into tSDS values. We then determined the Spearman’s  $\rho$   
269 associated with these permuted values to determine whether that for the true data  
270 was significantly elevated (see Methods for details). In all cases, the observed value  
271 was not significantly higher than for permuted values (see Figure S4 for histograms  
272 and exact  $P$ -values, which all exceed 0.05). We therefore conclude that these QTL  
273 datasets do not harbour SNPs with significantly different tSDS scores compared to

274 the rest of the genome.

275

## 276 ***Discussion***

### 277 *Summary of results*

278 We analysed an extensive *B. taurus* genomic dataset to identify signatures of  
279 recent selection in the Holstein breed, and to determine whether the data contained a  
280 signal of polygenic selection acting on milk proteins and QTLs underlying phenotypic  
281 variation in stature. Given the sample size and the demographic history of Holsteins,  
282 the SDS method can detect very recent selection events arising no more than  
283 approximately 740 years ago (Figure 1). A whole-genome scan for sSDS scores  
284 identified several targets of recent directional selection that overlap or lie close to  
285 protein-coding genes (Figure 2; Table 1). The genes whose functions are known are  
286 involved in protein regulation, catabolic processes, and neural-cell adhesion.  
287 Significant values were also observed near the MHC region. We subsequently  
288 investigated whether either milk protein genes or SNPs near stature QTLs  
289 collectively showed evidence of polygenic selection. We did so by testing whether  
290 there is a relationship between the QTL effect size, as measured by its *P*-value, and  
291 tSDS values to SNPs near them. However, no relationship was observed, even after  
292 performing a permutation test (Figures 3, S2-S4). Hence, while sSDS could reveal  
293 specific instances of recent selection, tests based on collective scores of variants  
294 associated with known selected traits yielded no signal of polygenic selection.

295

### 296 *Potential reasons for a lack of polygenic selection signal*

297 *Impact of Holstein demographic history*

298           While the SDS method detected individual candidate genes for very recent  
299 selection, we were unable to find strong evidence for polygenic selection acting on  
300 three traits that were subject to artificial selection since domestication. This result is *a*  
301 *priori* surprising, given that these traits have been subject to recent intense artificial  
302 selection. Recent studies generally find non-zero heritability estimates for them,  
303 indicating that there should be the potential for genetic variants underpinning them to  
304 change in response to artificial selection (Soyeurt *et al.*, 2007; Haile-Mariam *et al.*,  
305 2013; Buitenhuis *et al.*, 2016). In addition, the ratio of the mutation and recombination  
306 rates in cattle is just over three (Boitard *et al.*, 2016b; Harland *et al.*, 2018), indicating  
307 that several informative SNPs exist per haplotypes that should improve the power of  
308 the SDS method [in contrast, this ratio is approximately equal to one in humans  
309 (Field *et al.*, 2016)].

310           One potential reason for this lack of signal is due to the population history of  
311 *Bos taurus*. The effective population size of many *B. taurus* breeds appears to have  
312 undergone a decline since domestication (Sørensen *et al.*, 2005; Boitard *et al.*,  
313 2016b), which likely reflects successive bottlenecks due to domestication, breed  
314 formation and intense recent selection. Population size reductions are known to  
315 reduce the number of low-frequency variants and increases the prevalence of  
316 intermediate-frequency variants (Harpending *et al.*, 1998), which can affect the power  
317 of the SDS method. To understand if the history of *B. taurus* affects the detection of  
318 recent selection in Holstein cattle using SDS, we ran coalescent simulations to  
319 determine its ability to detect ongoing selection, given realistic Holstein population  
320 history and genetic parameters (see Methods for details). We simulated a partial

321 sweep occurring in the middle of a 10Mb region, either assuming a mutation rate in  
322 line with what has been inferred for Holstein, or one 10-fold higher to replicate  
323 diversity expected in a genetic region with an elevated mutation rate.

324 For the standard mutation rate, no SDS scores were produced for any  
325 simulations. After inspecting the simulation results, we see that there is a large skew  
326 in the distribution of singleton numbers per individual with a large number of  
327 individuals (over 20 on average) that do not carry singletons at the end of  
328 simulations, preventing the calculation of a local SDS score (Figure 4). This fraction  
329 remained the same irrespective of whether the simulated region was neutral or  
330 subject to selection; the main effect of a sweep was to reduce the mean number of  
331 singletons per individual, which is the signal measured by SDS (Field *et al.*, 2016).  
332 This reduction in overall singleton numbers is consistent with the known effects of  
333 population size contraction on reducing tip lengths (Harpending *et al.*, 1998).

334 With a 10-fold higher mutation rate, there were fewer cases where no  
335 individual harboured singletons (Figure 4). Accordingly, SDS scores could be  
336 calculated for 65 and 66 out of 100 simulations for the neutral and selective cases  
337 respectively. In these cases, sSDS values were significantly higher in the selected  
338 case than for the neutral case (Figure 5; two-sided Wilcox Test  $P = 1.1 \times 10^{-5}$ ).  
339 However, note that sSDS values is less than one for the selected case, which does  
340 not exceed the FDR threshold in our study (for the high  $N_0$  case, the smallest sSDS  
341 value with  $FDR < 0.05$  is 4.46).

342 Although singleton numbers differ between the two cases, a reduction in  
343 power could also be caused by a more general reduction in diversity due to the small  
344 recent effective population sizes of cattle. To investigate this effect, we estimated the

345 fixed  $N_e$  that would yield the same number of segregating sites in simulations using  
346 the standard mutation rate, based on Watterson's estimator (Watterson, 1975;  
347 Hudson, 1990; see Methods for details). In both cases where selection is present or  
348 absent,  $N_e$  estimates lie at around 25,000, which is that inferred at approximately  
349 halfway between the onset of domestication and the present day. (Boitard *et al.*,  
350 2016b; Figure S5). Given that estimates are similar irrespective of whether a sweep  
351 was present or not, the reduced population size caused by domestication could have  
352 also affected power due to limiting genetic variation and thus the potential to detect  
353 subtle sweep signatures associated with polygenic selection.

354 Overall, these simulations are consistent with population size reductions in *B.*  
355 *taurus* both reducing the overall genetic diversity and the number of singletons, which  
356 limits its ability to detect partial sweeps. SDS is more likely to detect signals in  
357 regions of elevated mutation rate, suggesting there will likely be an ascertainment  
358 bias in where signals are detected in the genome. The reduction in singletons also  
359 reduces the power to investigate SDS values in telomeric regions. SDS values are  
360 calculated using the distance up- and downstream from a SNP to the nearest  
361 singleton, and are undefined if a certain number of samples do not harbour  
362 singletons in either direction (Field *et al.*, 2016). SDS values are hence less likely to  
363 be defined in telomeric regions, as it is generally less feasible to observe singletons  
364 up until the end of the chromosome. This problem is exacerbated if there are few  
365 singletons overall.

366

367 *Other potential reasons for a lack of signal*

368 Another potential reason for a lack of signal is that the selection response on



369 these traits may have been driven by large-effect variants that have already fixed in  
370 the population, with a smaller contribution from small-effect mutations. Theoretical  
371 models have shown that more major-effect QTLs are likely to fix if the population lies  
372 further from a fitness optimum (Lande, 1983; Jain & Stephan, 2017b; Thornton,  
373 2019). Domesticated species, which experience strong and sustained directional  
374 artificial selection, especially in recent generations, could thereby fix more adaptive  
375 mutation via sweep-like processes compared to populations evolving in more stable  
376 environments (Lande, 1983; Jain & Stephan, 2017a). Furthermore, once a population  
377 has adapted to a new environment (the domestication phenotype in this case), then  
378 any remaining major-effect mutations are likely to be superseded by variants with  
379 weaker effects, which are harder to detect (Hayward & Sella, 2019). The response to  
380 polygenic selection will be further weakened in smaller populations (John & Stephan,  
381 2020), which could be a factor given the reduced effective population sizes of *B.*  
382 *taurus* (Sørensen *et al.*, 2005; Boitard *et al.*, 2016b). There is some evidence of this  
383 explanation; selective sweeps signatures are associated with stature QTLs  
384 (Bouwman *et al.*, 2018), and the study of van den Berg *et al.* (2020) was more likely  
385 to identify milk QTLs that had a moderate to high minor allele frequency, suggesting  
386 reduced power to detect low-frequency variants that are potential contributors to  
387 polygenic selection. Conversely, the stature meta-analysis by Bouwman *et al.* (2018)  
388 found significant SNPs that explained up to 13.8% of the variance in stature, which is  
389 similar to that explained by significant SNPs for human height (16%), which is a  
390 classic trait for polygenic selection studies. Hence, there may be sufficient polygenic  
391 SNPs present to test for polygenic selection, but the power will still be reduced due to  
392 the demographic history of Holstein cattle.

393 Potential solutions to increase power include increasing sample sizes; using  
394 alternative methods; or analysing different kinds of genome data to detect polygenic  
395 selection. Applying SDS to a larger sample size would increase the power to detect  
396 selection acting in the recent past [Figure 1; see also Field et al. (2016)], but overall  
397 power will still be limited by the tip-length of neutral genealogies. Recent  
398 developments in methodology involve directly inferring trees from genome data, and  
399 using these to identify subtle sweep signatures associated with trait variants (Edge &  
400 Coop, 2019; Speidel *et al.*, 2019; Stern *et al.*, 2021). These methods have greater  
401 power to detect weakly-selected mutations that may be segregating for longer than  
402 the tip-length of the population.

403 Another approach would be to look beyond sequence data and focus on gene  
404 networks [reviewed by Fagny & Austerlitz (2021)]. The recently-proposed ‘omnigenic’  
405 model (Boyle *et al.*, 2017; Liu *et al.*, 2019) posits that variation in quantitative traits is  
406 principally affected by a plethora of ‘peripheral’ genes that indirectly affect them,  
407 rather than a limited set of ‘core’ genes that directly modify a trait. These numerous  
408 peripheral genes may exert their influence via regulatory effects (e.g., gene  
409 expression changes), but are also expected to be highly pleiotropic. Fully testing the  
410 omnigenic model will require larger datasets and novel experimental designs (Wray  
411 *et al.*, 2018). A recent example is from an experiment with *Drosophila melanogaster*,  
412 where gene knockouts that do not pass a GWAS significance threshold for pupal  
413 length still significantly affect it (Zhang *et al.*, 2021). There is also nascent evidence  
414 that gene regulation may underlie directional polygenic selection. Boitard et al.  
415 (2016a) found that some adaptive signatures of *B. taurus* are located in intergenic  
416 regions; regulatory changes were also proposed to guide polygenic selection in

417 *Arabidopsis* (He *et al.*, 2016). Analyses of gene-sets associated with infection  
418 responses or immunity also found evidence for polygenic selection in humans and  
419 primates (Daub *et al.*, 2013, 2017; Svardal *et al.*, 2017). Immunity gene-sets might  
420 be exceptional cases, as they are more likely to contain genes subject to very strong  
421 selection (Castellano *et al.*, 2019). Further investigations using regulatory information  
422 and a broader range of gene-sets could be a promising approach to determine the  
423 impact of polygenic selection.

424

## 425 ***Materials and Methods***

426 Full methods are available in the Supplementary Text.

427

428 ***Acknowledgements.*** We would like to thank Simon Boitard for sharing his  
429 results on *B. taurus* demographic inference; Simon Boitard, Jon Slate and two  
430 anonymous reviewers for providing feedback on the manuscript. MH is supported by  
431 a NERC Independent Research Fellowship (NE/R015686/1). NAP, BG and TB are  
432 funded by a synergistic research grant from the Faculty of Science and Technology,  
433 Aarhus University, Denmark. MH and TB also acknowledge financial support from the  
434 European Research Council under the European Union's Seventh Framework  
435 Program (FP7/20072013, ERC Grant 311341). The authors declare no conflicts of  
436 interest.

437

438 ***Author contributions.*** All authors contributed to the study design. NAP and  
439 BG provided data. MH performed the analyses and wrote the manuscript, with  
440 feedback from NAP, BG and TB.

441

442           ***Data archiving.*** Raw SDS scores and polarisation information has been  
443 deposited on Dryad (<https://doi.org/10.5061/dryad.547d7wm8q>). Data analysis and  
444 simulation scripts are available on GitHub  
445 (<https://github.com/MattHartfield/CattleSDS>).

## 446 **References**

- 447 Barghi, N., Hermisson, J. & Schlötterer, C. (2020) Polygenic adaptation: a unifying  
448 framework to understand positive selection. *Nat. Rev. Genet.*, **21**, 769–781.
- 449 Barton, N.H., Etheridge, A.M. & Véber, A. (2017) The infinitesimal model: Definition,  
450 derivation, and implications. *Theor. Popul. Biol.*, **118**, 50–73.
- 451 Barton, N.H., Hermisson, J. & Nordborg, M. (2019) Why structure matters. *eLife*, **8**,  
452 e45380.
- 453 Barton, N.H. & Keightley, P.D. (2002) Understanding quantitative genetic variation.  
454 *Nat. Rev. Genet.*, **3**, 11–21.
- 455 Berg, I. van den, Xiang, R., Jenko, J., Pausch, H., Boussaha, M., Schrooten, C., *et*  
456 *al.* (2020) Meta-analysis for milk fat and protein percentage using imputed sequence  
457 variant genotypes in 94,321 cattle from eight cattle breeds. *Genet. Sel. Evol.*, **52**, 37.
- 458 Berg, J.J. & Coop, G. (2014) A Population Genetic Signal of Polygenic Adaptation.  
459 *PLoS Genet.*, **10**, e1004412.
- 460 Berg, J.J., Harpak, A., Sinnott-Armstrong, N., Joergensen, A.M., Mostafavi, H., Field,  
461 Y., *et al.* (2019a) Reduced signal for polygenic adaptation of height in UK Biobank.  
462 *eLife*, **8**, e39725.
- 463 Berg, J.J., Zhang, X. & Coop, G. (2019b) Polygenic Adaptation has Impacted Multiple  
464 Anthropometric Traits. *bioRxiv*, 167551.
- 465 Boitard, S., Boussaha, M., Capitan, A., Rocha, D. & Servin, B. (2016a) Uncovering  
466 Adaptation from Sequence Data: Lessons from Genome Resequencing of Four  
467 Cattle Breeds. *Genetics*, **203**, 433–450.
- 468 Boitard, S. & Rocha, D. (2013) Detection of signatures of selective sweeps in the  
469 Blonde d'Aquitaine cattle breed. *Anim. Genet.*, **44**, 579–583.

470 Boitard, S., Rodríguez, W., Jay, F., Mona, S. & Austerlitz, F. (2016b) Inferring  
471 Population Size History from Large Samples of Genome-Wide Molecular Data - An  
472 Approximate Bayesian Computation Approach. *PLoS Genet.*, **12**, e1005877.  
473 Bouwman, A.C., Daetwyler, H.D., Chamberlain, A.J., Ponce, C.H., Sargolzaei, M.,  
474 Schenkel, F.S., *et al.* (2018) Meta-analysis of genome-wide association studies for  
475 cattle stature identifies common genes that regulate body size in mammals. *Nat.*  
476 *Genet.*, **50**, 362–367.  
477 Boyle, E.A., Li, Y.I. & Pritchard, J.K. (2017) An Expanded View of Complex Traits:  
478 From Polygenic to Omnigenic. *Cell*, **169**, 1177–1186.  
479 Buitenhuis, B., Poulsen, N.A., Gebreyesus, G. & Larsen, L.B. (2016) Estimation of  
480 genetic parameters and detection of chromosomal regions affecting the major milk  
481 proteins and their post translational modifications in Danish Holstein and Danish  
482 Jersey cattle. *BMC Genet.*, **17**, 114.  
483 Bycroft, C., Freeman, C., Petkova, D., Band, G., Elliott, L.T., Sharp, K., *et al.* (2018)  
484 The UK Biobank resource with deep phenotyping and genomic data. *Nature*, **562**,  
485 203–209.  
486 Castellano, D., Uricchio, L.H., Munch, K. & Enard, D. (2019) Viruses rule over  
487 adaptation in conserved human proteins. *bioRxiv*, 555060.  
488 Charlesworth, B. & Edwards, A.W.F. (2018) A century of variance. *Significance*, **15**,  
489 20–25.  
490 Chevin, L.-M. (2019) Selective Sweep at a QTL in a Randomly Fluctuating  
491 Environment. *Genetics*, **213**, 987–1005.  
492 Chevin, L.-M. & Hospital, F. (2008) Selective Sweep at a Quantitative Trait Locus in  
493 the Presence of Background Genetic Variation. *Genetics*, **180**, 1645–1660.

- 494 Coop, G., Witonsky, D., Di Rienzo, A. & Pritchard, J.K. (2010) Using Environmental  
495 Correlations to Identify Loci Underlying Local Adaptation. *Genetics*, **185**, 1411–1423.
- 496 Daub, J.T., Hofer, T., Cutivet, E., Dupanloup, I., Quintana-Murci, L., Robinson-  
497 Rechavi, M., *et al.* (2013) Evidence for Polygenic Adaptation to Pathogens in the  
498 Human Genome. *Mol. Biol. Evol.*, **30**, 1544–1558.
- 499 Daub, J.T., Moretti, S., Davydov, I.I., Excoffier, L. & Robinson-Rechavi, M. (2017)  
500 Detection of Pathways Affected by Positive Selection in Primate Lineages Ancestral  
501 to Humans. *Mol. Biol. Evol.*, **34**, 1391–1402.
- 502 Duntsch, L., Tomotani, B.M., Villemereuil, P. de, Brekke, P., Lee, K.D., Ewen, J.G., *et*  
503 *al.* (2020) Polygenic basis for adaptive morphological variation in a threatened  
504 Aotearoa / New Zealand bird, the hihi ( *Notiomystis cincta* ). *Proc. R. Soc. B.*, **287**,  
505 20200948.
- 506 Edge, M.D. & Coop, G. (2019) Reconstructing the History of Polygenic Scores Using  
507 Coalescent Trees. *Genetics*, **211**, 235–262.
- 508 Ehrlich, M.A., Wagner, D.N., Oleksiak, M.F. & Crawford, D.L. (2021) Polygenic  
509 Selection within a Single Generation Leads to Subtle Divergence among Ecological  
510 Niches. *Genome Biol. Evol.*, **13**, evaa257.
- 511 Exposito-Alonso, M., 500 Genomes Field Experiment Team, Burbano, H.A.,  
512 Bossdorf, O., Nielsen, R. & Weigel, D. (2019) Natural selection on the *Arabidopsis*  
513 *thaliana* genome in present and future climates. *Nature*, **573**, 126–129.
- 514 Exposito-Alonso, M., Vasseur, F., Ding, W., Wang, G., Burbano, H.A. & Weigel, D.  
515 (2018) Genomic basis and evolutionary potential for extreme drought adaptation in  
516 *Arabidopsis thaliana*. *Nat. Ecol. Evol.*, **2**, 352–358.
- 517 Exposito-Alonso, M., Wilton, P. & Nielsen, R. (2020) Non-additive polygenic models

518 improve predictions of fitness traits in three eukaryote model species. *bioRxiv*,  
519 2020.07.14.194407.

520 Fagny, M. & Austerlitz, F. (2021) Polygenic Adaptation: Integrating Population  
521 Genetics and Gene Regulatory Networks. *Trends Genet.*, **37**, 631–638.

522 Field, Y., Boyle, E.A., Telis, N., Gao, Z., Gaulton, K.J., Golan, D., *et al.* (2016)  
523 Detection of human adaptation during the past 2000 years. *Science*, **354**, 760–764.

524 Fisher, R.A. (1918) The correlation between relatives on the supposition of  
525 Mendelian inheritance. *Trans. R. Soc. Edinb.*, **52**, 399–433.

526 Fuhrmann, N., Prakash, C. & Kaiser, T.S. (2021) Polygenic adaptation from standing  
527 genetic variation allows rapid ecotype formation. *bioRxiv*, 2021.04.16.440113.

528 Gazal, S., Finucane, H.K., Furlotte, N.A., Loh, P.-R., Palamara, P.F., Liu, X., *et al.*  
529 (2017) Linkage disequilibrium–dependent architecture of human complex traits  
530 shows action of negative selection. *Nat. Genet.*, **49**, 1421–1427.

531 Georges, M., Charlier, C. & Hayes, B. (2018) Harnessing genomic information for  
532 livestock improvement. *Nat. Rev. Genet.*

533 Gramlich, S., Liu, X., Favre, A., Alex Buerkle, C. & Karrenberg, S. (2021) A polygenic  
534 architecture with conditionally neutral effects underlies ecological differentiation in  
535 *Silene*. *bioRxiv*, 2021.07.06.451304.

536 Haile-Mariam, M., Nieuwhof, G.J., Beard, K.T., Konstatinov, K.V. & Hayes, B.J.  
537 (2013) Comparison of heritabilities of dairy traits in Australian Holstein-Friesian cattle  
538 from genomic and pedigree data and implications for genomic evaluations:  
539 Implication of genomic heritability for genomic evaluation. *J. Anim. Breed. Genet.*,  
540 **130**, 20–31.

541 Harland, C., Coppieters, W., Mullaart, E., Charlier, C. & Georges, M. (2018) *Rate of*



- 542 *de novo* mutation in dairy cattle and potential impact of reproductive technologies.  
543 Proc. World Congr. Genet. Appl. to Livest. Prod.
- 544 Harpending, H.C., Batzer, M.A., Gurven, M., Jorde, L.B., Rogers, A.R. & Sherry, S.T.  
545 (1998) Genetic traces of ancient demography. *Proc. Natl. Acad. Sci. USA*, **95**, 1961–  
546 1967.
- 547 Hayes, B.J., Bowman, P.J., Chamberlain, A.J. & Goddard, M.E. (2009) Invited review:  
548 Genomic selection in dairy cattle: Progress and challenges. *J. Dairy Sci.*, **92**, 433–  
549 443.
- 550 Hayward, L.K. & Sella, G. (2019) Polygenic adaptation after a sudden change in  
551 environment. *bioRxiv*, 792952.
- 552 He, F., Arce, A.L., Schmitz, G., Koornneef, M., Novikova, P., Beyer, A., *et al.* (2016)  
553 The Footprint of Polygenic Adaptation on Stress-Responsive Cis-Regulatory  
554 Divergence in the *Arabidopsis* Genus. *Mol. Biol. Evol.*, **33**, 2088–2101.
- 555 Hudson, R.R. (1990) Gene Genealogies and the Coalescent Process. In *Oxford*  
556 *Surveys in Evolutionary Biology* (ed. by Futuyma, D.J. & Antonovics, J.). Oxford Univ.  
557 Press, Oxford, pp. 1–42.
- 558 Jain, K. & Stephan, W. (2015) Response of Polygenic Traits Under Stabilizing  
559 Selection and Mutation When Loci Have Unequal Effects. *G3*, **5**, 1065–1074.
- 560 Jain, K. & Stephan, W. (2017a) Modes of Rapid Polygenic Adaptation. *Mol. Biol.*  
561 *Evol.*, **34**, 3169–3175.
- 562 Jain, K. & Stephan, W. (2017b) Rapid Adaptation of a Polygenic Trait After a Sudden  
563 Environmental Shift. *Genetics*, **206**, 389–406.
- 564 Jiménez-Mena, B., Tataru, P., Brøndum, R.F., Sahana, G., Guldbrandtsen, B. &  
565 Bataillon, T. (2016) One size fits all? Direct evidence for the heterogeneity of genetic

- 566 drift throughout the genome. *Biol. Lett.*, **12**.
- 567 John, S. & Stephan, W. (2020) Important role of genetic drift in rapid polygenic  
568 adaptation. *Ecol. Evol.*, **10**, 1278–1287.
- 569 Josephs, E.B., Berg, J.J., Ross-Ibarra, J. & Coop, G. (2019) Detecting Adaptive  
570 Differentiation in Structured Populations with Genomic Data and Common Gardens.  
571 *Genetics*, **211**, 989–1004.
- 572 Kreiner, J.M., Tranel, P.J., Weigel, D., Stinchcombe, J.R. & Wright, S.I. (2020) The  
573 genetic architecture and genomic context of glyphosate resistance in *Amaranthus*  
574 *tuberculatus*. *bioRxiv*, 2020.08.19.257972.
- 575 Lande, R. (1983) The response to selection on major and minor mutations affecting a  
576 metrical trait. *Heredity*, **50**, 47–65.
- 577 Le Corre, V. & Kremer, A. (2012) The genetic differentiation at quantitative trait loci  
578 under local adaptation. *Mol. Ecol.*, **21**, 1548–1566.
- 579 Lemay, D.G., Lynn, D.J., Martin, W.F., Neville, M.C., Casey, T.M., Rincon, G., *et al.*  
580 (2009) The bovine lactation genome: insights into the evolution of mammalian milk.  
581 *Genome Biol.*, **10**, R43.
- 582 Liu, X., Li, Y.I. & Pritchard, J.K. (2019) Trans Effects on Gene Expression Can Drive  
583 Omnigenic Inheritance. *Cell*, **177**, 1022-1034.e6.
- 584 MacEachern, S., Hayes, B., McEwan, J. & Goddard, M. (2009) An examination of  
585 positive selection and changing effective population size in Angus and Holstein cattle  
586 populations (*Bos taurus*) using a high density SNP genotyping platform and the  
587 contribution of ancient polymorphism to genomic diversity in Domestic cattle. *BMC*  
588 *Genom.*, **10**, 181.
- 589 MacLachlan, I.R., McDonald, T.K., Lind, B.M., Rieseberg, L.H., Yeaman, S. & Aitken,

- 590 S.N. (2021) Genome-wide shifts in climate-related variation underpin responses to  
591 selective breeding in a widespread conifer. *Proc. Natl. Acad. Sci. USA*, **118**,  
592 e2016900118.
- 593 Meuwissen, T., Hayes, B. & Goddard, M. (2013) Accelerating Improvement of  
594 Livestock with Genomic Selection. *Annu. Rev. Anim. Biosci.*, **1**, 221–237.
- 595 Nielsen, R. (2005) Molecular Signals of Natural Selection. *Annu. Rev. Genet.*, **39**,  
596 197–218.
- 597 Novembre, J. & Barton, N.H. (2018) Tread Lightly Interpreting Polygenic Tests of  
598 Selection. *Genetics*, **208**, 1351–1355.
- 599 Pavlidis, P., Metzler, D. & Stephan, W. (2012) Selective Sweeps in Multilocus Models  
600 of Quantitative Traits. *Genetics*, **192**, 225–239.
- 601 Pritchard, J.K. & Di Rienzo, A. (2010) Adaptation - not by sweeps alone. *Nat. Rev.*  
602 *Genet.*, **11**, 665–667.
- 603 Pritchard, J.K., Pickrell, J.K. & Coop, G. (2010) The Genetics of Human Adaptation:  
604 Hard Sweeps, Soft Sweeps, and Polygenic Adaptation. *Curr. Biol.*, **20**, R208–R215.
- 605 Qanbari, S., Pausch, H., Jansen, S., Somel, M., Strom, T.M., Fries, R., *et al.* (2014)  
606 Classic Selective Sweeps Revealed by Massive Sequencing in Cattle. *PLoS Genet.*,  
607 **10**, e1004148.
- 608 Qanbari, S., Pimentel, E.C.G., Tetens, J., Thaller, G., Lichtner, P., Sharifi, A.R., *et al.*  
609 (2010) A genome-wide scan for signatures of recent selection in Holstein cattle.  
610 *Anim. Genet.*
- 611 Racimo, F., Berg, J.J. & Pickrell, J.K. (2018) Detecting Polygenic Adaptation in  
612 Admixture Graphs. *Genetics*, **208**, 1565–1584.
- 613 Robinson, M.R., Hemani, G., Medina-Gomez, C., Mezzavilla, M., Esko, T.,

- 614 Shakhbazov, K., *et al.* (2015) Population genetic differentiation of height and body  
615 mass index across Europe. *Nat. Genet.*, **47**, 1357.
- 616 Rowan, T.N., Durbin, H.J., Seabury, C.M., Schnabel, R.D. & Decker, J.E. (2021)  
617 Powerful detection of polygenic selection and evidence of environmental adaptation  
618 in US beef cattle. *PLoS Genet.*, **17**, e1009652.
- 619 Sanjak, J.S., Sidorenko, J., Robinson, M.R., Thornton, K.R. & Visscher, P.M. (2018)  
620 Evidence of directional and stabilizing selection in contemporary humans. *Proc. Natl.*  
621 *Acad. Sci. USA*, **115**, 151–156.
- 622 Savolainen, O., Lascoux, M. & Merila, J. (2013) Ecological genomics of local  
623 adaptation. *Nat. Rev. Genet.*, **14**, 807–820.
- 624 Schoech, A.P., Jordan, D.M., Loh, P.-R., Gazal, S., O'Connor, L.J., Balick, D.J., *et al.*  
625 (2019) Quantification of frequency-dependent genetic architectures in 25 UK Biobank  
626 traits reveals action of negative selection. *Nat. Commun.*, **10**, 790.
- 627 Sella, G. & Barton, N.H. (2019) Thinking About the Evolution of Complex Traits in the  
628 Era of Genome-Wide Association Studies. *Annu. Rev. Genom. Hum. Genet.*, **20**,  
629 461–493.
- 630 Sohail, M., Maier, R.M., Ganna, A., Bloemendal, A., Martin, A.R., Turchin, M.C., *et al.*  
631 (2019) Polygenic adaptation on height is overestimated due to uncorrected  
632 stratification in genome-wide association studies. *eLife*, **8**, e39702.
- 633 Sørensen, A.C., Sørensen, M.K. & Berg, P. (2005) Inbreeding in Danish Dairy Cattle  
634 Breeds. *J. Dairy Sci.*, **88**, 1865–1872.
- 635 Soyeurt, H., Gillon, A., Vanderick, S., Mayeres, P., Bertozzi, C. & Gengler, N. (2007)  
636 Estimation of Heritability and Genetic Correlations for the Major Fatty Acids in Bovine  
637 Milk. *J. Dairy Sci.*, **90**, 4435–4442.

- 638 Speidel, L., Forest, M., Shi, S. & Myers, S.R. (2019) A method for genome-wide  
639 genealogy estimation for thousands of samples. *Nat Genet.*, **51**, 1321–1329.
- 640 Stephan, W. (2016) Signatures of positive selection: from selective sweeps at  
641 individual loci to subtle allele frequency changes in polygenic adaptation. *Mol. Ecol.*,  
642 **25**, 79–88.
- 643 Stephan, W. (2019) Selective Sweeps. *Genetics*, **211**, 5–13.
- 644 Stern, A.J., Speidel, L., Zaitlen, N.A. & Nielsen, R. (2021) Disentangling selection on  
645 genetically correlated polygenic traits via whole-genome genealogies. *Am. J. Hum.*  
646 *Genet.*, **108**, 219–239.
- 647 Stetter, M.G., Thornton, K. & Ross-Ibarra, J. (2018) Genetic architecture and  
648 selective sweeps after polygenic adaptation to distant trait optima. *PLoS Genet.*, **14**,  
649 e1007794.
- 650 Svardal, H., Jasinska, A.J., Apetrei, C., Coppola, G., Huang, Y., Schmitt, C.A., *et al.*  
651 (2017) Ancient hybridization and strong adaptation to viruses across African vervet  
652 monkey populations. *Nat. Genet.*, **49**, 1705–1713.
- 653 Thornton, K.R. (2019) Polygenic Adaptation to an Environmental Shift: Temporal  
654 Dynamics of Variation Under Gaussian Stabilizing Selection and Additive Effects on a  
655 Single Trait. *Genetics*, **213**, 1513–1530.
- 656 Turchin, M.C., Chiang, C.W., Palmer, C.D., Sankararaman, S., Reich, D., Genetic  
657 Investigation of ANthropometric Traits (GIANT) Consortium, *et al.* (2012) Evidence of  
658 widespread selection on standing variation in Europe at height-associated SNPs. *Nat*  
659 *Genet.*, **44**, 1015–1019.
- 660 Uricchio, L.H., Kitano, H.C., Gusev, A. & Zaitlen, N.A. (2019) An evolutionary  
661 compass for detecting signals of polygenic selection and mutational bias. *Evol. Lett.*,

- 662 **3**, 69–79.
- 663 Visscher, P.M. & Goddard, M.E. (2019) From R.A. Fisher’s 1918 Paper to GWAS a  
664 Century Later. *Genetics*, **211**, 1125–1130.
- 665 Vitti, J.J., Grossman, S.R. & Sabeti, P.C. (2013) Detecting Natural Selection in  
666 Genomic Data. *Annu. Rev. Genet.*, **47**, 97–120.
- 667 Vladar, H.P. de & Barton, N. (2014) Stability and Response of Polygenic Traits to  
668 Stabilizing Selection and Mutation. *Genetics*, **197**, 749–767.
- 669 Watterson, G.A. (1975) On the number of segregating sites in genetical models  
670 without recombination. *Theor. Popul. Biol.*, **7**, 256–276.
- 671 Whitlock, M.C. (2008) Evolutionary inference from  $F_{ST}$ . *Mol. Ecol.*, **17**, 1885–1896.
- 672 Wieters, B., Steige, K.A., He, F., Koch, E.M., Ramos-Onsins, S.E., Gu, H., *et al.*  
673 (2021) Polygenic adaptation of rosette growth in *Arabidopsis thaliana*. *PLoS Genet.*,  
674 **17**, e1008748.
- 675 Wollstein, A. & Stephan, W. (2014) Adaptive Fixation in Two-Locus Models of  
676 Stabilizing Selection and Genetic Drift. *Genetics*, **198**, 685–697.
- 677 Wray, N.R., Kemper, K.E., Hayes, B.J., Goddard, M.E. & Visscher, P.M. (2019)  
678 Complex Trait Prediction from Genome Data: Contrasting EBV in Livestock to PRS in  
679 Humans. *Genetics*, **211**, 1131–1141.
- 680 Wray, N.R., Wijmenga, C., Sullivan, P.F., Yang, J. & Visscher, P.M. (2018) Common  
681 Disease Is More Complex Than Implied by the Core Gene Omnigenic Model. *Cell*,  
682 **173**, 1573–1580.
- 683 Yang, J., Bakshi, A., Zhu, Z., Hemani, G., Vinkhuyzen, A.A.E., Lee, S.H., *et al.* (2015)  
684 Genetic variance estimation with imputed variants finds negligible missing heritability  
685 for human height and body mass index. *Nat. Genet.*, **47**, 1114–1120.

686 Yeaman, S., Hodgins, K.A., Lotterhos, K.E., Suren, H., Nadeau, S., Degner, J.C., *et*  
687 *al.* (2016) Convergent local adaptation to climate in distantly related conifers.  
688 *Science*, **353**, 1431.

689 Zan, Y. & Carlborg, Ö. (2018) A Polygenic Genetic Architecture of Flowering Time in  
690 the Worldwide *Arabidopsis thaliana* Population. *Mol. Biol. Evol.*, **36**, 141–154.

691 Zeder, M.A. (2008) Domestication and early agriculture in the Mediterranean Basin:  
692 Origins, diffusion, and impact. *Proc. Natl. Acad. Sci. USA*, **105**, 11597–11604.

693 Zeng, J., Vlaming, R. de, Wu, Y., Robinson, M.R., Lloyd-Jones, L.R., Yengo, L., *et al.*  
694 (2018) Signatures of negative selection in the genetic architecture of human complex  
695 traits. *Nat. Genet.*, **50**, 746–753.

696 Zeng, J., Xue, A., Jiang, L., Lloyd-Jones, L.R., Wu, Y., Wang, H., *et al.* (2021)  
697 Widespread signatures of natural selection across human complex traits and  
698 functional genomic categories. *Nat. Commun.*, **12**, 1164.

699 Zhang, W., Reeves, G.R. & Tautz, D. (2021) Testing Implications of the Omnigenic  
700 Model for the Genetic Analysis of Loci Identified through Genome-wide Association.  
701 *Curr. Biol.*, **31**, 1092-1098.e6.

702 Zhao, F., McParland, S., Kearney, F., Du, L. & Berry, D.P. (2015) Detection of  
703 selection signatures in dairy and beef cattle using high-density genomic information.  
704 *Genet. Sel. Evol.*, **47**, 49.

705 Zhou, X., Carbonetto, P. & Stephens, M. (2013) Polygenic Modeling with Bayesian  
706 Sparse Linear Mixed Models. *PLoS Genet.*, **9**, e1003264.

707

708

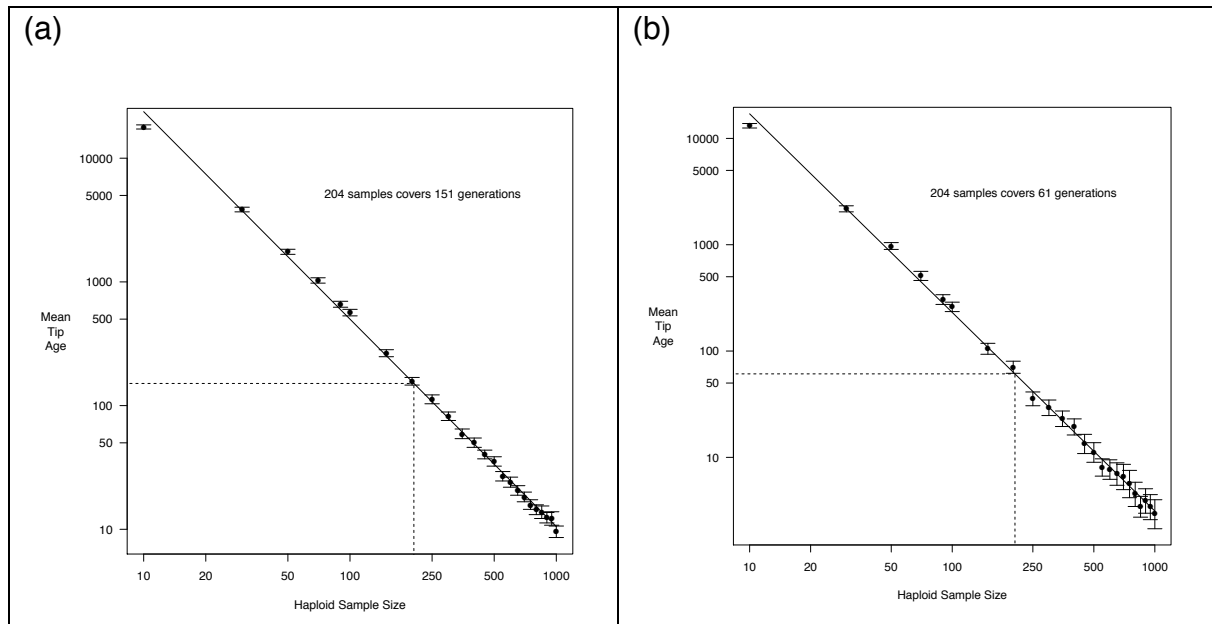

709 Figure 1: Simulated mean tip age for *B. taurus*, as a function of the number of haploid  
710 samples. Simulations assumed either (a) demography as inferred by Boitard et al.  
711 (2016b) (the ‘High  $N_0$ ’ model), or (b) the same but with a smaller present-day  $N_e$  of  
712 49 (the ‘Low  $N_0$ ’ model). Points are the mean values; bars show 95% confidence  
713 intervals. The solid line is the best linear fit to the log of both values; dotted lines  
714 show the predicted tip age for 204 alleles.



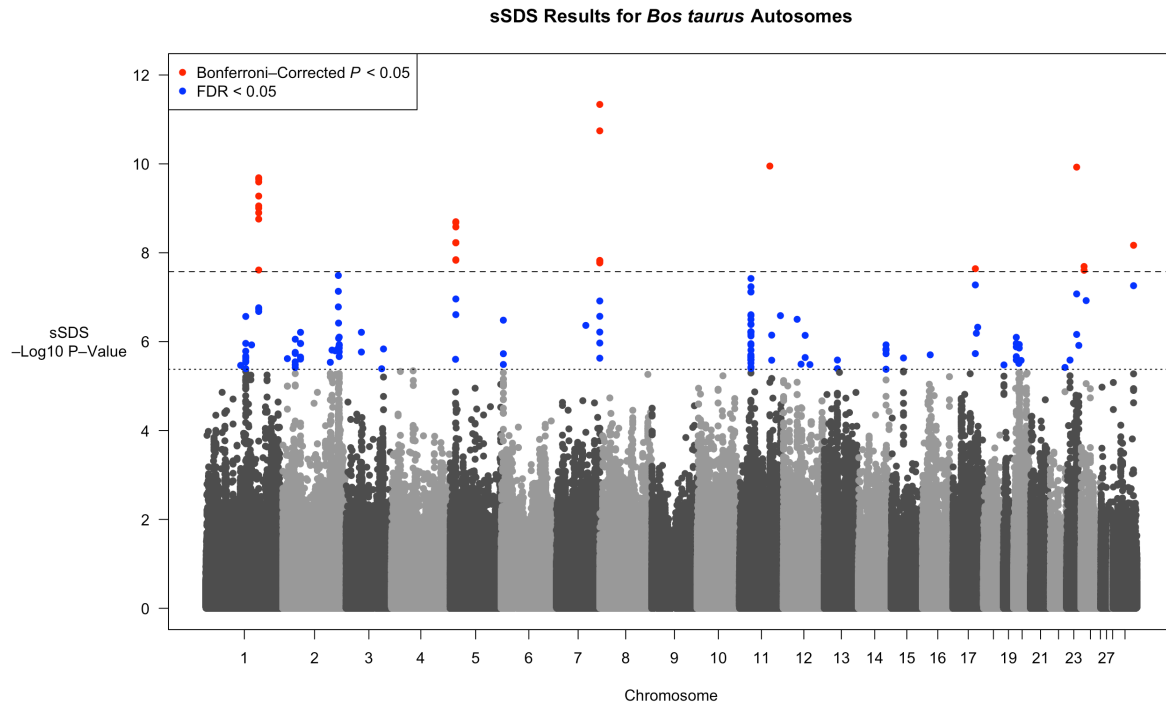

715

716

Figure 2:  $P$ -values of sSDS scores across *B. taurus* autosomes, as plotted on a

717

negative  $\text{Log}_{10}$  scale, as a function of the chromosome. Alternating black and grey

718

points show (non-significant) values from different chromosomes. Blue points are

719

SNPs with  $FDR < 0.05$ , with the cut-off denoted by a horizontal dotted line. Red

720

points are SNPs with Bonferroni-corrected  $P$ -value  $< 0.05$  (actual  $P$ -value  $< \sim 2.7 \times$

721

$10^{-8}$ ), with the cut-off denoted by a horizontal dashed line. Figure S1 shows results

722

for the Low  $N_0$  model.

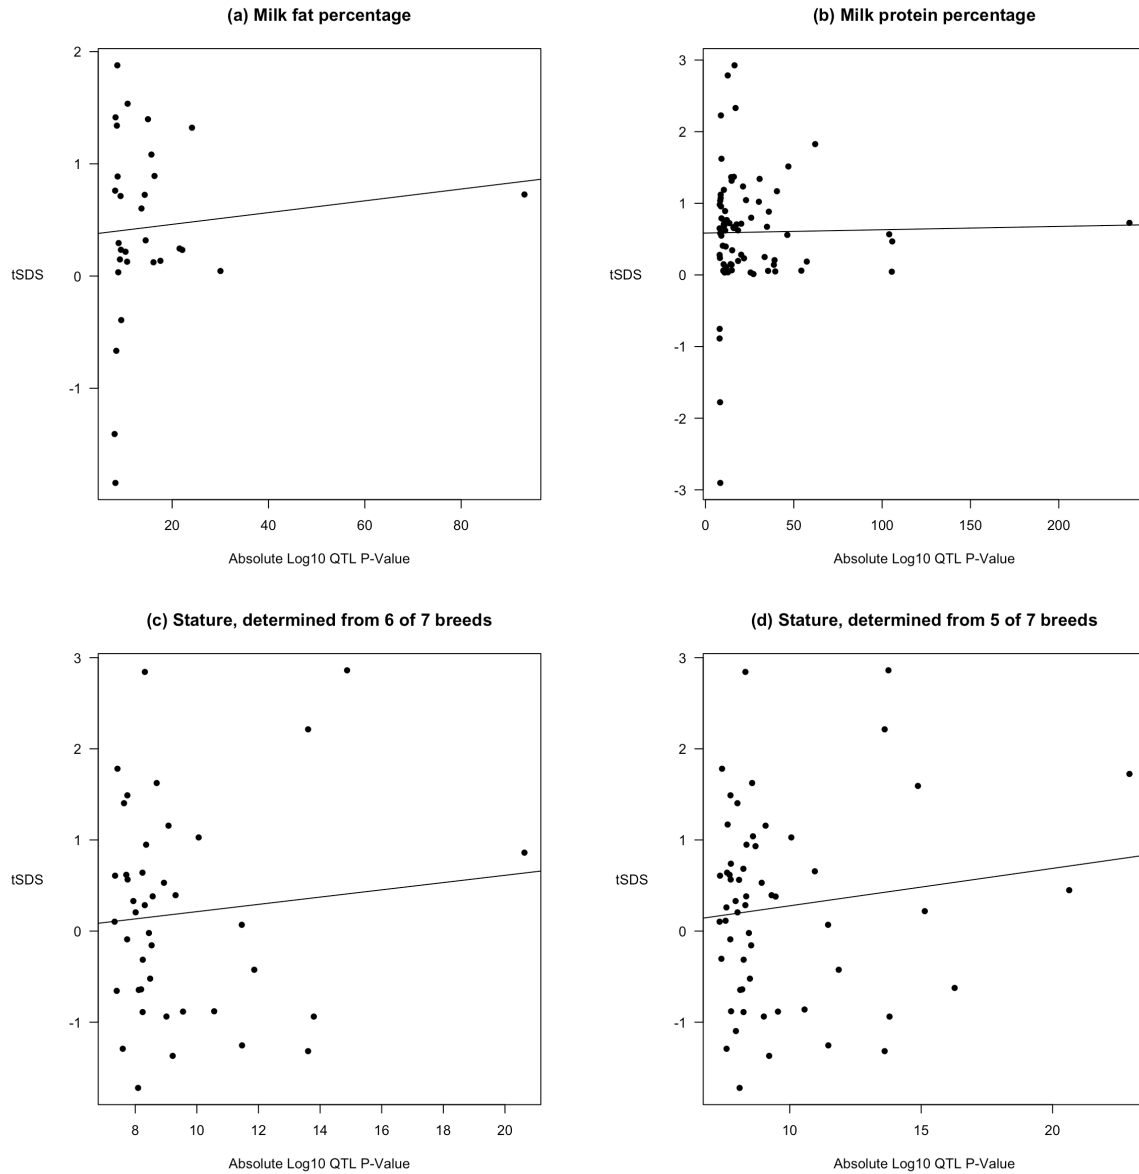

723

724 Figure 3: Relationship between tSDS scores near milk or stature QTLs, as noted in  
725 the subheadings, and the absolute log  $P$ -value of QTLs. Lines show a linear model  
726 regression fit. Figure S3 shows results assuming a low  $N_0$  model.

727

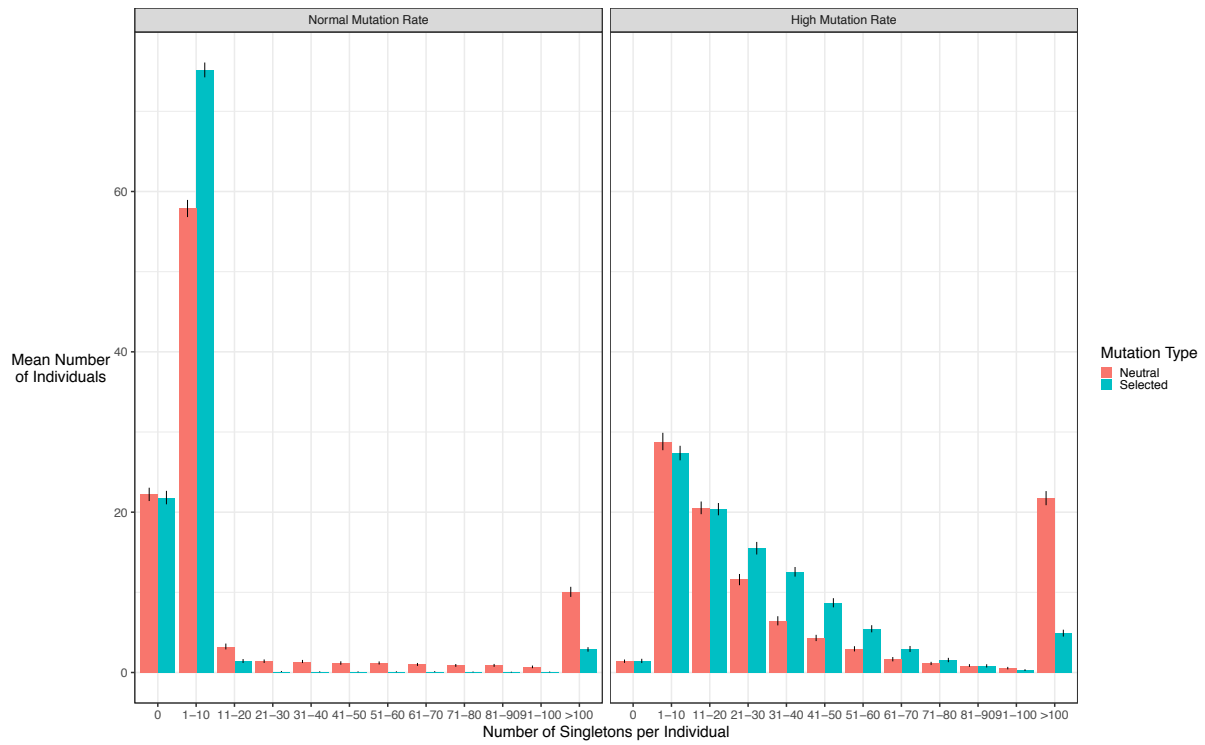

728

729 Figure 4: Mean distribution of singleton numbers per individual for each simulation,  
730 wither assuming a standard mutation rate (left) or a 10-fold higher mutation rate  
731 (right). Bars represent 95% confidence intervals.

732

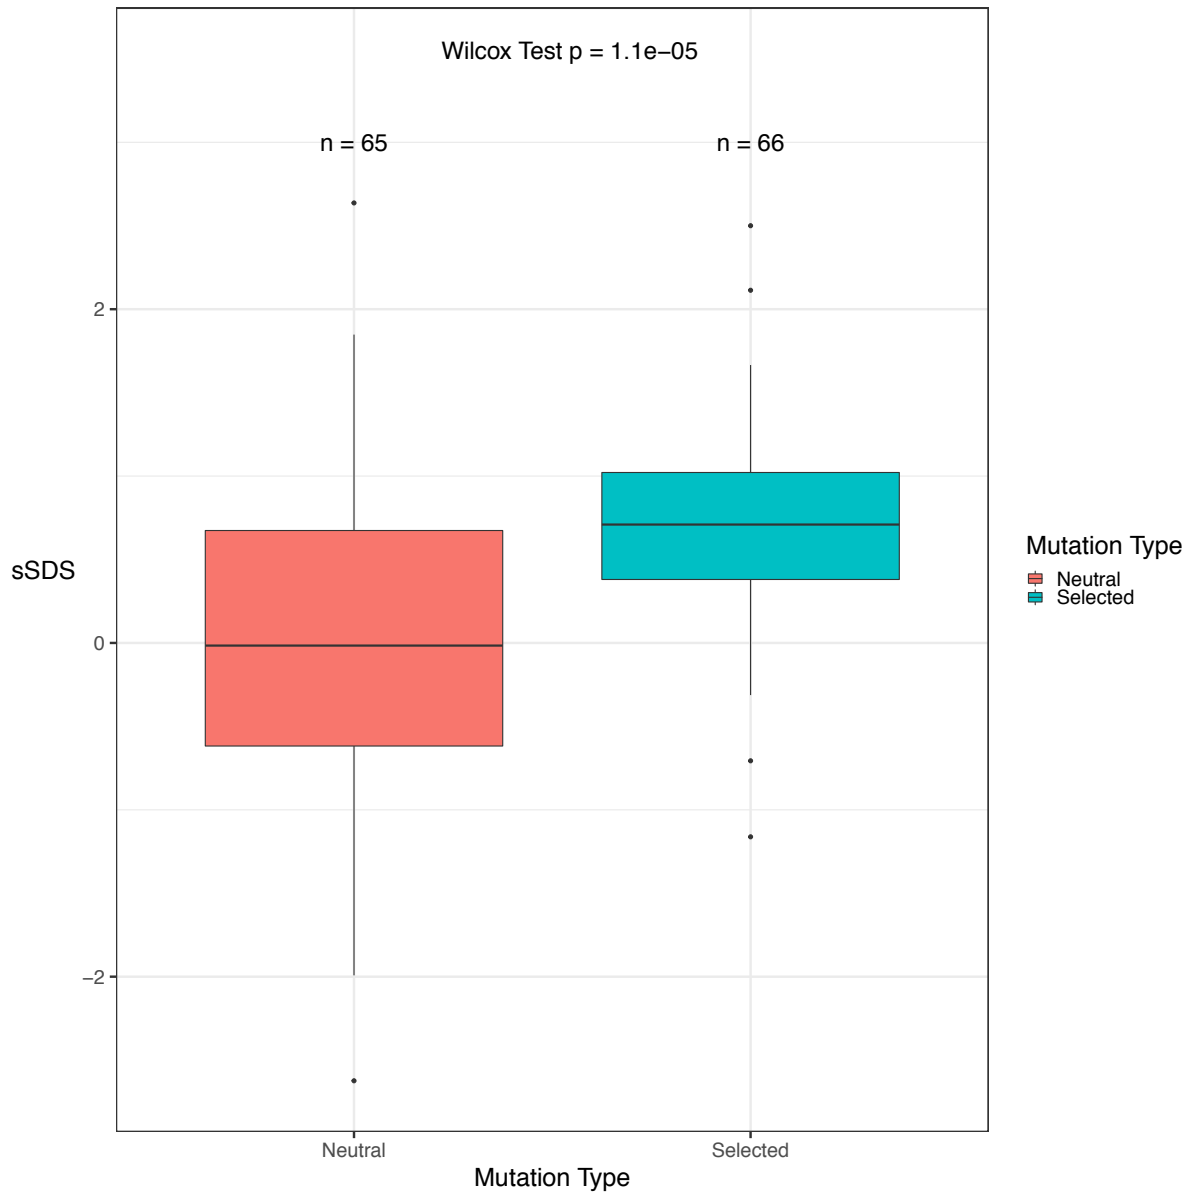

733

734 Figure 5: Distribution of simulated sSDS scores assuming a high mutation rate, for

735 the neutral and selected cases. Numbers above each box plot denotes how many

736 simulations produced SDS scores and were included in the plot.

737

738

739

| Chromosome | Gene Name | Start Position | End Position | Gene Biotype   | High, Low $N_0$ |
|------------|-----------|----------------|--------------|----------------|-----------------|
| 1          | PPM1L     | 106405113      | 106727070    | Protein Coding | High, Low       |
| 5          | TMCC3     | 24306913       | 24595494     | Protein Coding | High, Low       |
| 5          | CEP83     | 24070404       | 24345243     | Protein Coding | High, Low       |
| 17         | U6        | 43381106       | 43381209     | snRNA          | Low             |
| 17         | CTSO      | 43364999       | 43381605     | Protein Coding | Low             |
| 17         | TDO2      | 43386894       | 43403747     | Protein Coding | High, Low       |
| 23         | OR12D2H   | 29291787       | 29292713     | Protein Coding | High, Low       |
| 23         | OR12D2E   | 29305933       | 29309785     | Protein Coding | High, Low       |
| 24         | GAREM1    | 24694637       | 24927333     | Protein Coding | High, Low       |
| 29         | NTM       | 34576918       | 34994005     | Protein Coding | High, Low       |

740

741 Table 1: Genes that overlap or lie close to Bonferroni–significant sSDS regions. The

742 ‘High, Low  $N_0$ ’ column specifies which genes are close to significant SNPs for each

743  $N_0$  model.
